# Supplementary material for: Functional expression of TLR5 of different vertebrate species and diversification in intestinal pathogen recognition
Source: PubMed Central journal article supplement (PMC6062626; doi:10.1038/s41598-018-29371-0), 2018-07-26
Supplement: 41598_2018_29371_MOESM1_ESM.pdf [file 41598_2018_29371_MOESM1_ESM.pdf]

# Supplementary Information

## **Functional expression of TLR5 from different vertebrate species and diversification towards intestinal pathogen recognition**

Eugenia Faber <sup>1</sup>, Karsten Tedin <sup>2</sup>, Yvonne Speidel <sup>1</sup>, Melanie M. Brinkmann <sup>3</sup>,  
Christine Josenhans <sup>1,4\*</sup>

<sup>1</sup> Medizinische Hochschule Hannover, Institute for Medical Microbiology, Carl-Neuberg-Strasse 1, 30625 Hannover, Germany

<sup>1</sup> DZIF-German Center for Infection Research, Partner site Hannover-Braunschweig, Germany

<sup>2</sup> Institute of Microbiology and Epizootics, Free University Berlin, Germany

<sup>3</sup> Helmholtz Center for Infection Research, Braunschweig, Germany

<sup>4</sup> Max von Pettenkofer Institute, Ludwig Maximilians University Munich, Pettenkoferstrasse 9a, 80336 Munich, Germany

\*Address correspondence to:  
Christine Josenhans; [Josenhans@mvp.uni-muenchen.de](mailto:Josenhans@mvp.uni-muenchen.de)

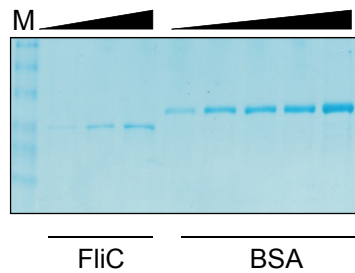

**Faber *et al.*, Figure S1**

**Fig. S1: determination of protein amount and purity of highly purified recombinant *S. Typhimurium* FliC.** Different amounts of recombinantly expressed and highly purified *S. Typhimurium* FliC (used as reference protein for TLR5 activation) were loaded on an SDS gel and stained with Simply Blue Safestain (Novex): M: protein molecular mass standard (Bench Mark Prestained, Novex), lane 1 from left: 20 ng FliC; lane 2: 100 ng FliC, lane 3: 200 ng FliC, lane 4: 100 ng BSA, lane 5: 200 ng BSA, lane 6: 300 ng BSA, lane 7: 500 ng BSA, lane 8: 1 µg BSA.

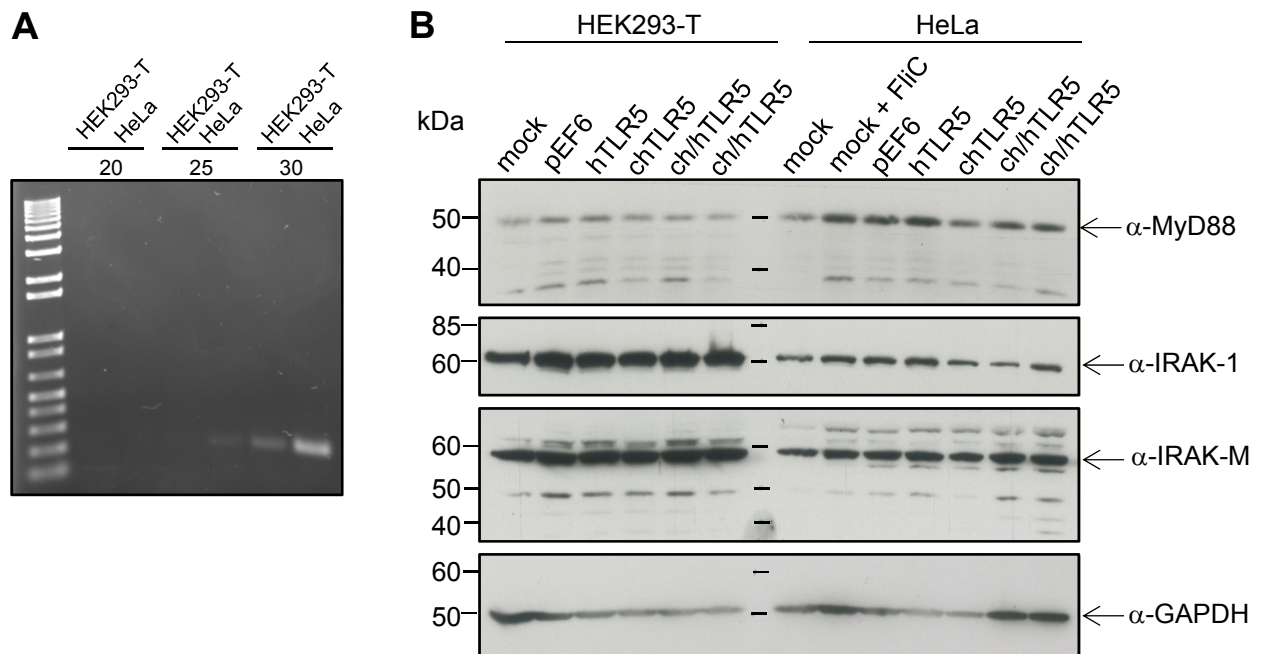

Faber *et al.*, Figure S2

**Fig. S2: comparative expression of TLR signaling pathway components in HEK293-T and HeLa cells.** **A)** Semiquantitative PCRs for MyD88 transcript were performed using cDNA of HEK293-T or HeLa cells as template and the following primers: hMyD88\_F1 and hMyD88\_R1. 5  $\mu$ l of the amplified PCR product (after 20, 25 or 30 amplification cycles) was loaded on a 1% agarose gel. **B)** Western blot analysis using cleared lysates of empty vector (200 ng) or TLR5-V5 construct-transfected HEK293-T (h: 75 ng, ch: 200 ng, ch/h: 200 ng and 250 ng) or HeLa cells (h: 50 ng, ch: 500 ng, ch/h: 50 ng and 100 ng) using anti-MyD88, anti-IRAK-1, anti-IRAK-M and anti-GAPDH antibodies (see Table S6).

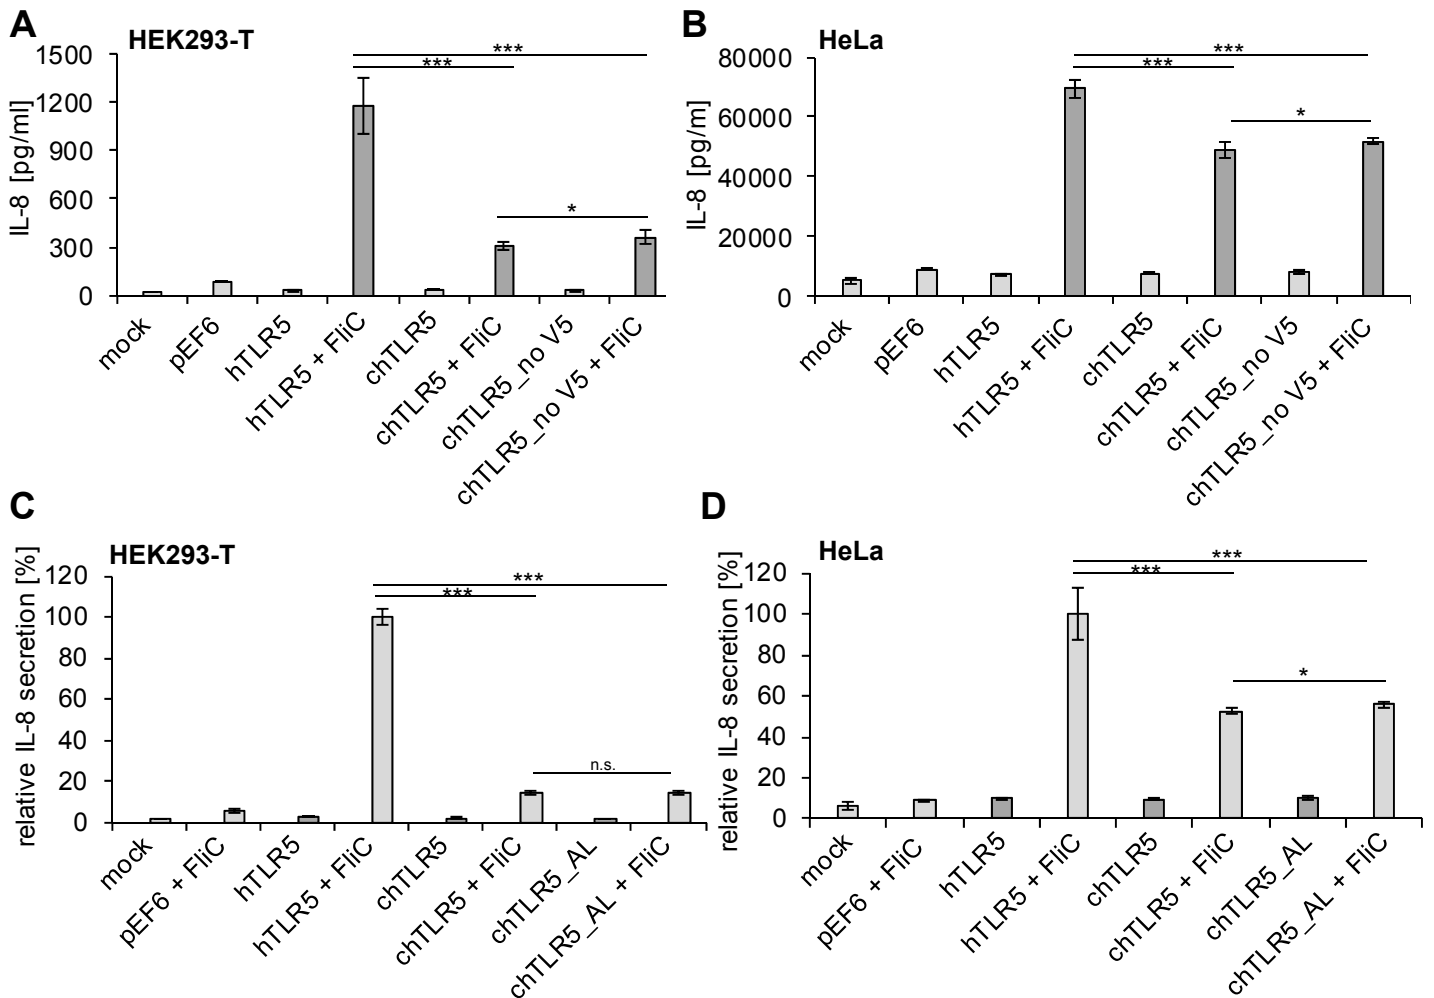

**Faber et al., Figure S3**

**Fig. S3: C-terminal V5-tag or an alternative 3' upstream sequence have minor influence on the activation efficiency of expression constructs for chicken TLR5 by *Salmonella* FliC.** HEK293-T (A, C) or HeLa cells (B, D) were transiently transfected with empty vector pEF6-V5: 200 ng; human TLR5-V5: 100 ng; chicken TLR5-V5 or same construct without V5 tag: 200 ng. For comparison, expression constructs for chicken TLR5-V5 with alternative upstream (AL) sequences were analyzed. 48 h post transfection, cells were coincubated with purified recombinant *Salmonella* FliC (50 ng/well), followed by a measurement of secreted IL-8 in cell supernatants. C and D: IL-8 secretion of hTLR5-transfected and FliC-activated cells was set to 100 % (reference); relative IL-8 secretion of other constructs with regard to the reference is depicted in [%]. Mean and standard deviation from technical triplicates of biological duplicates of a representative experiment are shown. Significant differences between FliC-stimulated hTLR5 and activated chicken TLR5 variants as well as between activated chTLR5 and activated mutated chTLR5 variants are indicated by asterisks (Student's *t*-test, unpaired, two-tailed) as follows: \*, 0.01<*p*<0.05; \*\*, 0.001<*p*<0.01; and \*\*\*, *p*<0.001, n.s. non-significant.

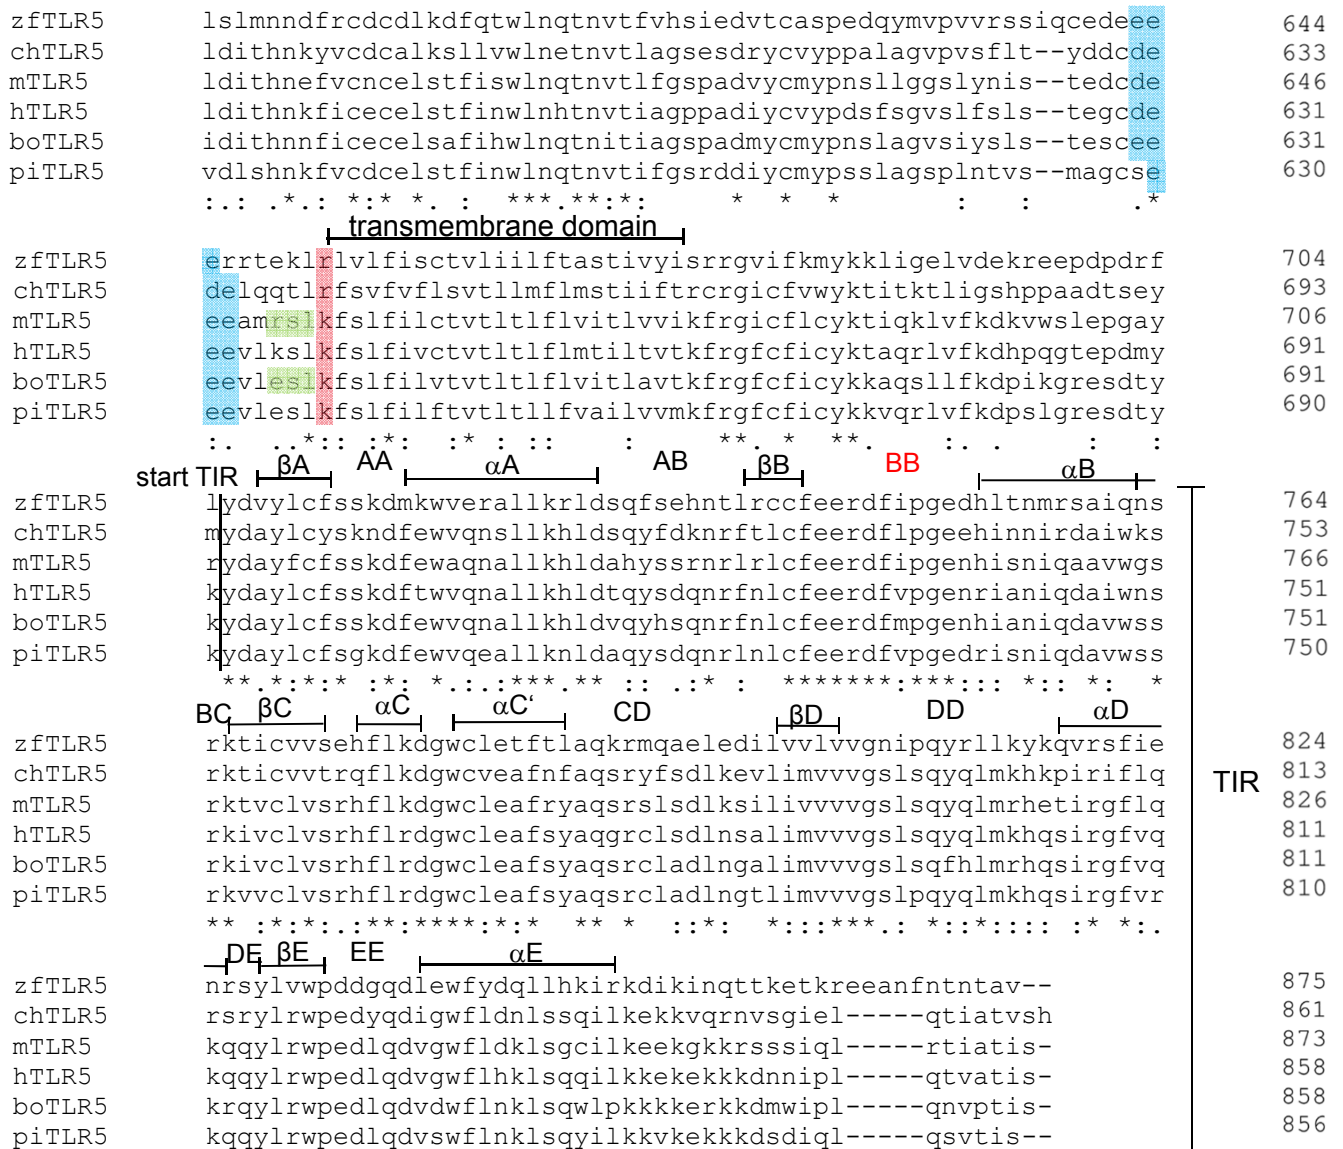

### Faber *et al.*, Figure S4

**Fig. S4: alignment of partial TLR5 amino acid sequences (focus and transmembrane and intracellular domains) from different vertebrate species.** Amino acid sequences of TLR5 receptors from different vertebrate species (zf: zebrafish, ch: chicken, m: murine, h: human, bo: bovine, pi: porcine) were aligned using ClustalW2 (Larkin *et al.*, 2007). Structural components of intracellular TIR domains were assigned according to (Xu *et al.* 2000) and are depicted as abbreviations above the alignment. These components include the BB loop (BB in red) which is involved in TIR-TIR interactions. The start residue of the C-terminal human segment after the non-human N-terminal ECD domain within the chimeric receptor constructs is marked in red. Amino acid exchanges in chimeric mouse/human and bovine/human TLR5 generated in this study by the cloning strategy are marked in green and are as follows: m/h: RSL to TGT and bo/h: ESL to SGT. Acidic residues in the linker domain upstream of the transmembrane domain, which are most likely important for the interaction of TLR5 with UNC93B1 (as shown for mouse UNC93B1 and murine nucleotide-sensing TLRs (Kim *et al.*, 2013) and for proper TLR5 functionality (Huh *et al.*, 2013)), are not affected by the cloning strategy of the chimeric proteins and are shaded in blue.

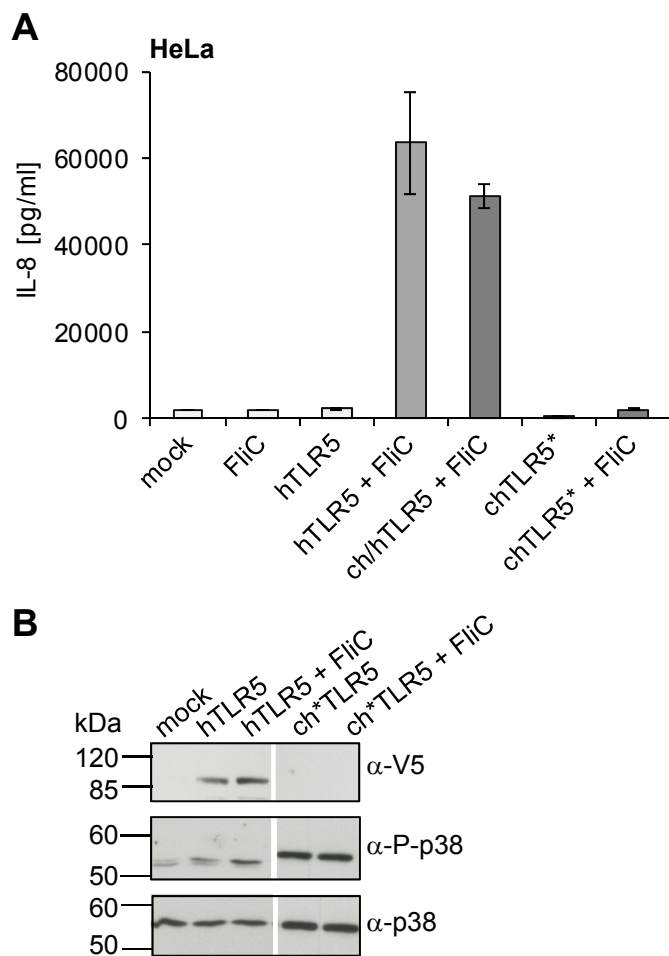

**Faber et al., Figure S5**

**Fig. S5: mutation of amino acid 744 in the chicken TIR domain to human counterpart results in abolished expression of receptor.** HeLa cells were transiently transfected with human (h) TLR5-V5: 100 ng; chicken/human chimeric (ch/h) TLR5-V5: 100 ng or mutated chicken (ch\*) TLR5-V5 (amino acid 744 N to A): 200 ng. 48 h post transfection, cells were coincubated with purified recombinant *Salmonella* FliC (50 ng/well), followed by a measurement of secreted IL-8 in cell supernatants. Mean and standard deviation from technical triplicates of biological duplicates of one representative experiment are shown. **(A)**. Western Blot analysis of cleared lysates of transfected HeLa cells detected using anti-V5 antibody, anti-P-p38 antibody and anti-p38 antibody **(B)** (see Table S6).

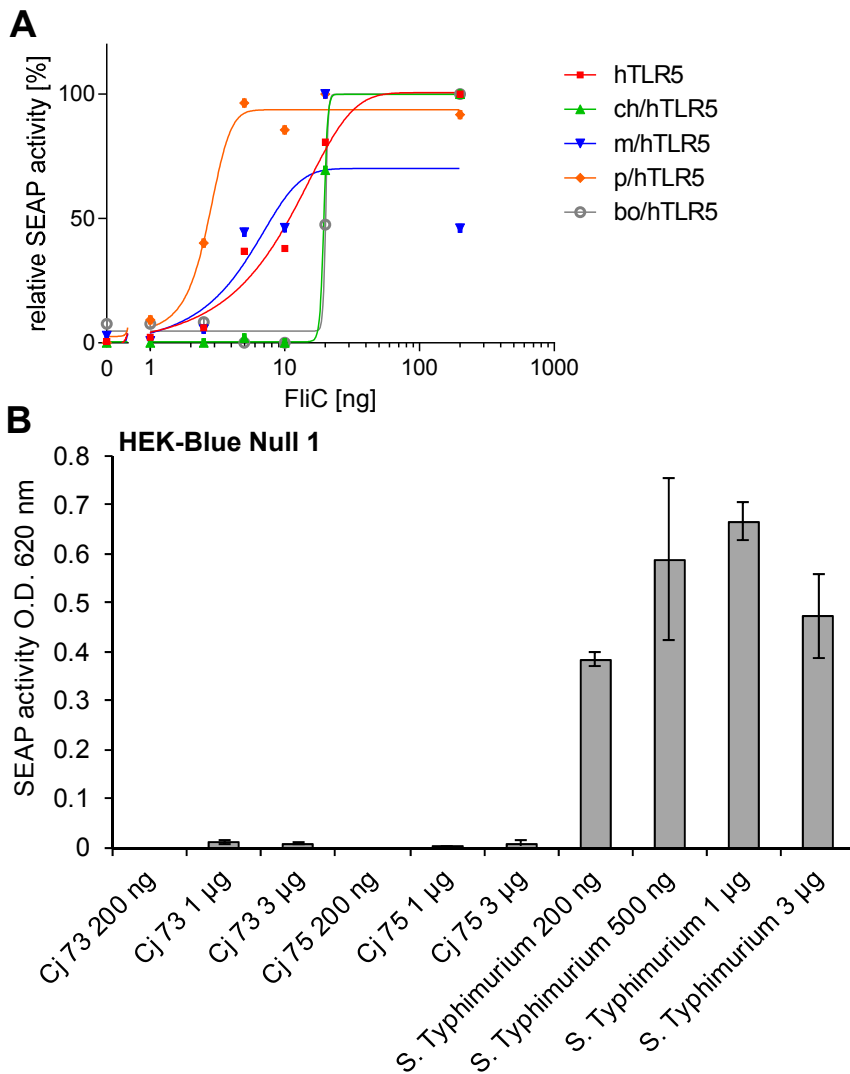

**Faber et al., Figure S6**

**Fig. S6: controls for experimental setup of ECD-dependent TLR5 signaling screening system. A)** Non-linear regression curves of dose responses of chimeric TLR5 receptors for determination of optimal activation doses for the system (measured original values shown in Fig. 3 B). Values are depicted relative to a reference (corresponding TLR5 construct activated by maximal dosage of FliC), set as 100%. Regression was performed using GraphPad Prism 6 using the variable slope model (four parameter dose-response curve). **B)** NF-κB activation of human TLR5 by increasing amounts of *C. jejuni* and *S. Typhimurium* lysates (dose dependency determination). HEK-Blue Null1 NF-κB reporter cells were transiently transfected with 100 ng DNA of human TLR5-V5. After 24 hours, transfected cells were coincubated with 200 ng to 3 µg protein content of *C. jejuni* (isolate Cj 73 or Cj 75) or *S. Typhimurium* whole bacterial lysates per well for 11 h; NF-κB-dependent SEAP production was determined by colorimetric measurements at 620 nm (see Methods). Absolute values of the colorimetric tests are shown. Background activation was determined by activation of empty vector-transfected cells by the corresponding lysate and subtracted from each test value to quantify specifically the TLR5-dependent activation. Mean and standard deviation from technical triplicates of a representative experiment are shown.

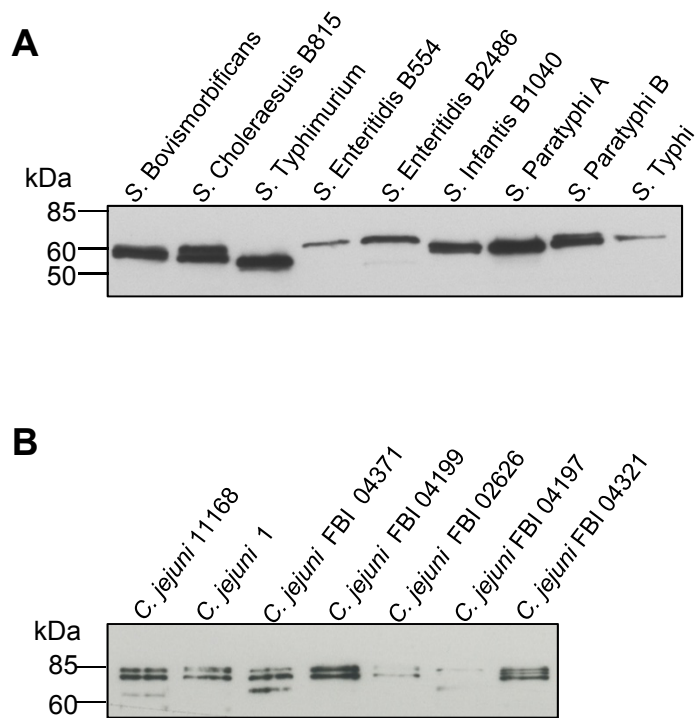

Faber *et al.*, Figure S7

**Fig. S7: comparison of flagellin expression by selected *Salmonella enterica* serovars (A) and *C. jejuni* (B) isolates in whole bacterial lysates.** Western Blot analysis of selected *Salmonella* or *C. jejuni* lysates (5 µg total protein/lane) using anti-*E. coli* flagellin antibody, which specifically recognizes flagellin proteins in *Salmonella* and *Campylobacter*. *S. Enteritidis* B554 only expresses FliC, while *S. Choleraesuis* B815 expresses only FliB.



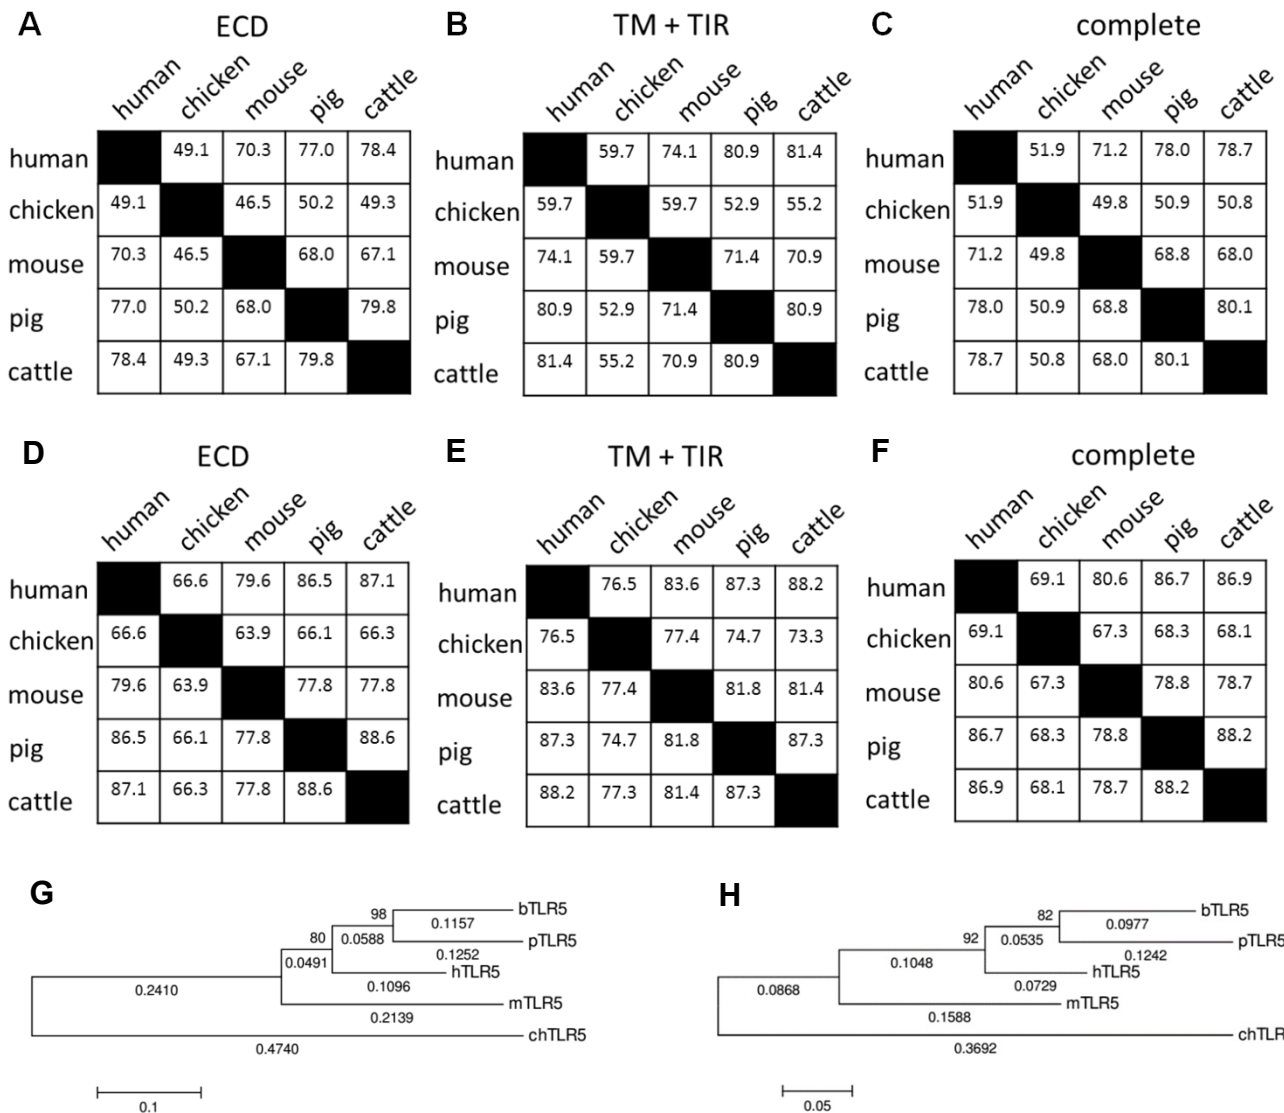

**Faber et al., Figure S8**

**Fig. S8: pairwise amino acid sequence comparison of TLR5 from various vertebrate species. A to F:** matrix depiction of pairwise amino acid sequence comparison of TLR5 from different vertebrate species regarding amino acid sequence identity (in [%], **A to C**) or amino acid sequence similarity (in [%], **D to F**) using pairwise alignment and final analysis with Needle ([http://www.ebi.ac.uk/Tools/psa/emboss\\_needle/](http://www.ebi.ac.uk/Tools/psa/emboss_needle/)). ECD: ectodomain, TM: transmembrane domain, TIR: Toll/interleukin-1 receptor homology domain. ECD (**A, D**), TM plus TIR (**B, E**) and complete sequences (**C, F**) were analyzed separately. **G and H**) Maximum Likelihood Trees of ECD (**G**) and TM plus TIR (**H**) of TLR5 from different species (human (h), chicken (ch), mouse (m), pig (p) and bovine (b) TLR5) generated with MEGA5.2 (Tamura et al., 2011) including 500 bootstrap repetitions.

```

          *           20           *           40           *
B554_FliC : -LNKSSSSLSSAEEFLSSGLRINSA DDAAGQAIANRFTSNINGLTQASRNANDGIS : 56
B2359_FliC : -LNKSSSSLSSAEEFLSSGLRINSA DDAAGQAIANRFTSNINGLTQASRNANDGIS : 56
B2486_FliC : -LNKSSSSLSSAEEFLSSGLRINSA DDAAGQAIANRFTSNINGLTQASRNANDGIS : 56
B2334_FliC : -LNKSSSSLSSAEEFLSSGLRINSA DDAAGQAIANRFTSNINGLTQASRNANDGIS : 56
R160_FliC : -LNKSSSALGTAEFLSSGLRINSA DDAAGQAIANRFTANINGLTQASRNANDGIS : 56
B1533_FliC : -LNKSSSALGTAEFLSSGLRINSA DDAAGQAIANRFTANINGLTQASRNANDGIS : 56
B1830_FliC : -LNKSSSAXGTAEFLSSGLRINSA DDAAGQAIANRXTANINGLTQASRNANDGIS : 56
B1040_FliC : -LNKSSSALGTAEFLSSGLRINSA DDAAGQAIANRFTANINGLTQASRNANDGIS : 56
B1085_FliC : -LNKSSSALGTAEFLSSGLRINSA DDAAGQAIANRFTANINGLTQASRNANDGIS : 56
B2075_FliC : -LNKSSSALGTAEFLSSGLRINSA DDAAGQAIANRFTANINGLTQASRNANDGIS : 56
B2078_FliC : -LNKSSSALGTAEFLSSGLRINSA DDAAGQAIANRFTANINGLTQASRNANDGIS : 56
B2183_FliC : -LNKSSSALGTAEFLSSGLRINSA DDAAGQAIANRFTANINGLTQASRNANDGIS : 56
B2257_FliC : -LNKSSSALGTAEFLSSGLRINSA DDAAGQAIANRFTANINGLTQASRNANDGIS : 56
B2396_FliC : -LNKSSSALGTAEFLSSGLRINSA DDAAGQAIANRFTANINGLTQASRNANDGIS : 56
xy82_FliC : -LNKSSSALGTAEFLSSGLRINSA DDAAGQAIANRFTANINGLTQASRNANDGIS : 56
R269_FliC : -LNKSSSALGTAEFLSSGLRINSA DDAAGQAIANRFTANINGLTQASRNANDGIS : 56
xy810_FliC : -LNKSSSALGTAEFLSSGLRINSA DDAAGQAIANRFTANINGLTQASRNANDGIS : 56
B571_FliC : ---PSALGTAEFLSSGLRINSA DDAAGQAIANRFTANINGLTQASRNANDGIS : 53
B1951_FliC : -LNKSSSALGTAEFLSSGLRINSA DDAAGQAIANRFTANINGLTQASRNANDGIS : 56
B560_FliC : -LNKSSSALGTAEFLSSGLRINSA DDAAGQAIANRFTANINGLTQASRNANDGIS : 57
B558_FliC : -LNKSSSALGTAEFLSSGLRINSA DDAAGQAIANRFTANINGLTQASRNANDGIS : 56
          QS   3AIER S GLRINSAKDDAAGQAIANR T NIKGLTQASRNANDGIS

```

```

          60           *           80           *           100           *
B554_FliC : IACTTEGALNEINNNLQVRVRELSVQATNGTNS SSDLKSIQDEIQQLLEIDRVSNQT : 113
B2359_FliC : IACTTEGALNEINNNLQVRVRELSVQATNGTNS SSDLKSIQDEIQQLLEIDRVSNQT : 113
B2486_FliC : IACTTEGALNEINNNLQVRVRELSVQATNGTNS SSDLKSIQDEIQQLLEIDRVSNQT : 113
B2334_FliC : IACTTEGALNEINNNLQVRVRELSVQATNGTNS SSDLKSIQDEIQQLLEIDRVSNQT : 113
R160_FliC : IACTTEGALNEINNNLQVRVRELAVSANSTNS SDDLDSIQAEITQRLNEIDRVSGQT : 113
B1533_FliC : IACTTEGALNEINNNLQVRVRELAVSANGTNS SDDLDSIQAEITQRLNEIDRVSGQT : 113
B1830_FliC : XACTTEGALNEINNNLQVRVRELAVSANGTNS SDDLDSIQAEITQRLNEIDRVSGQT : 113
B1040_FliC : IACTTEGALNEINNNLQVRVRELAVSANSTNS SDDLDSIQAEITQRLNEIDRVSGQT : 113
B1085_FliC : IACTTEGALNEINNNLQVRVRELAVSANSTNS SDDLDSIQAEITQRLNEIDRVSGQT : 113
B2075_FliC : IACTTEGALNEINNNLQVRVRELAVSANSTNS SDDLDSIQAEITQRLNEIDRVSGQT : 113
B2078_FliC : IACTTEGALNEINNNLQVRVRELAVSANSTNS SDDLDSIQAEITQRLNEIDRVSGQT : 113
B2183_FliC : IACTTEGALNEINNNLQVRVRELAVSANSTNS SDDLDSIQAEITQRLNEIDRVSGQT : 113
B2257_FliC : IACTTEGALNEINNNLQVRVRELAVSANSTNS SDDLDSIQAEITQRLNEIDRVSGQT : 113
B2396_FliC : IACTTEGALNEINNNLQVRVRELAVSANSTNS SDDLDSIQAEITQRLNEIDRVSGQT : 113
xy82_FliC : IACTTEGALNEINNNLQVRVRELAVSANSTNS SDDLDSIQAEITQRLNEIDRVSGQT : 113
R269_FliC : IACTTEGALNEINNNLQVRVRELAVSANSTNS SDDLDSIQAEITQRLNEIDRVSGQT : 113
xy810_FliC : IACTTEGALNEINNNLQVRVRELAVSANSTNS SDDLDSIQAEITQRLNEIDRVSGQT : 113
B571_FliC : IACTTEGALNEINNNLQVRVRELAVSANSTNS SDDLDSIQAEITQRLNEIDRVSGQT : 110
B1951_FliC : IACTTEGALNEINNNLQVRVRELAVSANSTNS SDDLDSIQAEITQRLNEIDRVSGQT : 113
B560_FliC : XACTTEGALNEINNNLQVRVRELAVSANSTNS SDDLDSIQAEITQRLNEIDRVSGQT : 114
B558_FliC : IACTTEGALNEINNNLQVRVRELAVSANSTNS SDDLDSIQAEITQRLNEIDRVSGQT : 113
          AQTTEGALNEINNNLQVRVREL VQ N TNS SDL SIQ EI QRL EIDRVS QT

```

```

          120           *           140           *           160           *
B554_FliC : CFNGVWLAQDNILTIQVGANDGETIDIDLQKIDVKS LGLDGFNVVGPKEATVGD LK : 170
B2359_FliC : CFNGVWLSQDNQMKIQVGANDGETITIDLQKIDVKS LGLDGFNVVGPKEATVGD LK : 170
B2486_FliC : CFNGVWLSQDNQMKIQVGANDGETITIDLQKIDVKS LGLDGFNVVGPKEATVGD LK : 170
B2334_FliC : CFNGVWLSQDNQMKIQVGANDGETITIDLQKIDVKS LGLDGFNVVGPKEATVGD LK : 170
R160_FliC : CFNGVWLAQDNILTIQVGANDGETIDIDLKQINSQTLGLD TLNVQDAYTPKGTAVT : 170
B1533_FliC : CFNGVWLAQDNILTIQVGANDGETIDIDLKEISSKTLGLDKPNVQDAYTPKETAVT : 170
B1830_FliC : CXNGVWLAQDNILTIQVGANDGETIDIDLKEISSKTLGLDKLNVO DAYTPKETAVT : 170
B1040_FliC : CFNGVWLAQDNILTIQVGANDGETIDIDLKQINSQTLGLD TLNVQKQYKVSDTAAT : 170
B1085_FliC : CFNGVWLAQDNILTIQVGANDGETIDIDLKQINSQTLGLD TLNVQKQYKVSDTAAT : 170
B2075_FliC : CFNGVWLAQDNILTIQVGANDGETIDIDLKQINSQTLGLD TLNVQKQYKVSDTAAT : 170
B2078_FliC : CFNGVWLAQDNILTIQVGANDGETIDIDLKQINSQTLGLD TLNVQKQYKVSDTAAT : 170
B2183_FliC : CFNGVWLAQDNILTIQVGANDGETIDIDLKQINSQTLGLD TLNVQKQYKVSDTAAT : 170
B2257_FliC : CFNGVWLAQDNILTIQVGANDGETIDIDLKQINSQTLGLD TLNVQKQYKVSDTAAT : 170
B2396_FliC : CFNGVWLAQDNILTIQVGANDGETIDIDLKQINSQTLGLD TLNVQKQYKVSDTAAT : 170
xy82_FliC : CFNGVWLAQDNILTIQVGANDGETIDIDLKQINSQTLGLD TLNVQKQYKVSDTAAT : 170
R269_FliC : CFNGVWLAQDNILTIQVGANDGETIDIDLKQINSQTLGLD TLNVQKQYKVSDTAAT : 170
xy810_FliC : CFNGVWLAQDNILTIQVGANDGETIDIDLKQINSQTLGLD TLNVQKQYKVSDTAAT : 170
B571_FliC : CFNGVWLAQDNILTIQVGANDGETIDIDLKQINSQTLGLD TLNVQKAYDVQATVEN : 167
B1951_FliC : CFNGVWLAQDNILTIQVGANDGETIDIDLKQINSQTLGLD TLNVQKQYKVSSEAVT : 170
B560_FliC : CFNGVWLAQDNILTIQVGANDGETIDIDLKQINSQTLGLD TLNVQKQYKVDVSTVVT : 171
B558_FliC : CFNGVWLAQDNILTIQVGANDGETIDIDLKQINSQTLGLD TLNVQKQYKVDVSTVVT : 170
          Q NGVKVL QDN 6 IQVGANDGETI IDL I 3LGLD V

```

Continued on next page

```

      180          *          200          *          220
B554_FliC : SSFKNVTGYDTYAAAGADKYRVDINSAGVVTDAAPDKVYVNAANGQLTTDDAENNTA : 227
B2359_FliC : SSFKNVTGYDTYAAAGADKYRVDINSAGVVTDAAPDKVYVNAANGQLTTDDAENNTA : 227
B2486_FliC : SSFKNVTGYDTYAAAGADKYRVDINSAGVVTDAAPDKVYVNAANGQLTTDDAENNTA : 227
B2334_FliC : SSFKNVTGYDTYAAAGADKYRVDINSAGVVTDAVAPDKVYVNAANGQLTTDDAENNTA : 227
R160_FliC : RDVTTYKNGGTTLTAPNA-----AATDIALGTTGAA--CTAAVKFKDGN----- : 213
B1533_FliC : VDKTTYKNGTDPITAAQSN-----TDIQTALIGGGATG--VTGADIKFKDGGQYYLD- : 217
B1830_FliC : VDKTTYKNGTDPITAAQSN-----TDIQTALIGGGATG--VTGADIKFKDGGQYYLD- : 217
B1040_FliC : VTGYTDSATAIDKSTFAA-----SATTLGGTPAITG--DLK-FDDTTGKY----- : 213
B1085_FliC : VTGYTDSATAIDKSTFAA-----SATTLGGTPAITG--DLK-FDDTTGKY----- : 213
B2075_FliC : VTGYTDSATAIDKSTFAA-----SATTLGGTPAITG--DLK-FDDTTGKY----- : 213
B2078_FliC : VTGYTDSATAIDKSTFAA-----SATTLGGTPAITG--DLK-FDDTTGKY----- : 213
B2183_FliC : VTGYTDSATAIDKSTFAA-----SATTLGGTPAITG--DLK-FDDTTGKY----- : 213
B2257_FliC : VTGYTDSATAIDKSTFAA-----SATTLGGTPAITG--DLK-FDDTTGKY----- : 213
B2396_FliC : VTGYTDSATAIDKSTFAA-----SATTLGGTPAITG--DLK-FDDTTGKY----- : 213
xy82_FliC : VTGYTDSATAIDKSTFAA-----SATTLGGTPAITG--DLK-FDDTTGKY----- : 213
R269_FliC : VTGYADTTIALDNSTFKA-----SATGLGGTDQKID--GDL-KFDDTTGKY----- : 213
xy810_FliC : ASYSDSKQNI-----VPD-----KATTAIKIGAATS--GGAGIKADISFKDQGY- : 213
B571_FliC : SVKLD-TSALTADAIKGG-----VTCATLACALK-D--GKVSNGTDYVVEV--- : 210
B1951_FliC : PSATLSTALDGAALKT-----GTGSTTDTGSIKD--GKVYYNSTSKNYVVEV- : 216
B560_FliC : QSLDLKTAGITGATLKAG-----IIGTTTETGTSVKD--GKVYYDADSKNYVVEV- : 218
B558_FliC : QSLDLKTAGITGATLKAG-----IIGTTTETGTSVKD--GKVYYDADSKNYVVEV- : 217

```

```

      *          240          *          260          *          280
B554_FliC : VDLFKTTKSTAGTAEAKAIAAGAIKGGKGGDTFDYKGVFTTI-D--TKTGDDNGKVS : 281
B2359_FliC : VDLFKTTKSTAGTAEAKAIAAGAIKGGKGGDTFDYKGVFTTI-D--TKTGDDNGKVS : 281
B2486_FliC : VDLFKTTKSTAGTAEAKAIAAGAIKGGKGGDTFDYKGVFTTI-D--TKTGDDNGKVS : 281
B2334_FliC : VDLFKTTKSTAGTAEAKAIAAGAIKGGKGGDTFDYKGVFTTI-D--TKTGDDNGKVS : 281
R160_FliC : -----FVEVTGTT-----KDGLYEATVDAAGAVTMTANKATVTGASTVTENQI : 256
B1533_FliC : ----VKGGASAGVYKATYDETT-TKKVNIDITDKTPLATAEATAI-RGTATITHNQIA : 268
B1830_FliC : ----VKGGASAGVYKATYDETT-TKKVNIDITDKTPLATAEATAI-RGTATITHNQIA : 268
B1040_FliC : ----ADVSTGTTAKDG-----VYEVTVAADGK-VTLTGTP-TGPIIAGFPSTA : 254
B1085_FliC : ----ADVSTGTTAKDG-----VYEVTVAADGK-VTLTGTP-TGPIIAGFPSTA : 254
B2075_FliC : ----ADVSTGTTAKDG-----VYEVTVAADGK-VTLTGTP-TGPIIAGFPSTA : 254
B2078_FliC : ----ADVSTGTTAKDG-----VYEVTVAADGK-VTLTGTP-TGPIIAGFPSTA : 254
B2183_FliC : ----ADVSTGTTAKDG-----VYEVTVAADGK-VTLTGTP-TGPIIAGFPSTA : 254
B2257_FliC : ----ADVSTGTTAKDG-----VYEVTVAADGK-VTLTGTP-TGPIIAGFPSTA : 254
B2396_FliC : ----ADVSTGTTAKDG-----VYEVTVAADGK-VTLTGTP-TGPIIAGFPSTA : 254
xy82_FliC : ----ADVSTGTTAKDG-----VYEVTVAADGK-VTLTGTP-TGPIIAGFPSTA : 254
R269_FliC : ----YAKV---TVTGGTGGK---DGYEYVVDKTNGE-VTLAGGA-TSPLTGGLPATA : 258
xy810_FliC : ----YATVSGYDDAADIDK---NGTYEVTVAADTGAVTIFATRPT-VVDLPTDAKAVS : 262
B571_FliC : ----SFADATDS-----GK---NGFLKVDVNTTGAVTVPAAAA-NVVAARAVGSE : 254
B1951_FliC : ----EFTDATTQ-----TN---KGGFY-KVNVADDGAVTMTAAT-TKEATPTTGITE : 259
B560_FliC : ----DFTDITDK-----AA---HAGFYKADVADADGNVSLATGAT-KEAKPTNAVEVE : 262
B558_FliC : ----DFTDITDK-----AA---HAGFYKADVADADGNVSLATGAT-KEAKPTNAVEVE : 261

```

```

      *          300          *          320          *          340
B554_FliC : TTINGEKVLTVAADIATGATDVNAATLQSSKNVYTSVNVGQFTFDDTK-NESAKLS : 337
B2359_FliC : TTINGEKVLTVAADIATGATDVNAATLQSSKNVYTSVNVGQFTFDDTK-NESAKLS : 337
B2486_FliC : TTINGEKVLTVAADIATGATDVNAATLQSSKNVYTSVNVGQFTFDDTK-NESAKLS : 337
B2334_FliC : TTINGEKVLTVAADIAIGAADVNAATLQSSKNVYTSVNVGQFTFDDTK-NESAKLS : 337
R160_FliC : VDAVTPTPVD---TVAAATALTNAAGVTGA--TGNTSLVKMSFEDKNGVTDAGYALKV : 309
B1533_FliC : EVTKEGVDTTVAQAALAAAGVTGAD-----KDNTSLVKLSFEDKNGVIDGGYAVKM : 320
B1830_FliC : EVTKEGVDTTVAQAALAAAGVTGAD-----KDNTSLVKLSFEDKNGVIDGGYAVKM : 320
B1040_FliC : TKDVKQTQQENADLTEAKAALTAAGVAA--AGTASVVKMSYTDNNGTIDGGLAV-K : 308
B1085_FliC : TKDVKQTQQENADLTEAKAALTAAGVAA--AGTASVVKMSYTDNNGTIDGGLAV-K : 308
B2075_FliC : TKDVKQTQQENADLTEAKAALTAAGVAA--AGTASVVKMSYTDNNGTIDGGLAV-K : 308
B2078_FliC : TKDVKQTQQENADLTEAKAALTAAGVAA--AGTASVVKMSYTDNNGTIDGGLAV-K : 308
B2183_FliC : TKDVKQTQQENADLTEAKAALTAAGVAA--AGTASVVKMSYTDNNGTIDGGLAV-K : 308
B2257_FliC : TKDVKQTQQENADLTEAKAALTAAGVAA--AGTASVVKMSYTDNNGTIDGGLAV-K : 308
B2396_FliC : TKDVKQTQQENADLTEAKAALTAAGVAA--AGTASVVKMSYTDNNGTIDGGLAV-K : 308
xy82_FliC : TKDVKQTQQENADLTEAKAALTAAGVAA--AGTASVVKMSYTDNNGTIDGGLAV-K : 308
R269_FliC : TEDVKNVQVAADLLEAKAALTAAGV--TGTASVVKMSYTDNNGTIDGGLAV-K : 310
xy810_FliC : KVQNDTEIA---ATNAKAALKAAGVADAEADTATLVKMSYTDNNGVIDGGFAFKT : 316
B571_FliC : VTEVQGLNTP---SSAVQDQLTAAGVSAAADAAKSEVVKMSYTDKNGTIDGGFGVKV : 308
B1951_FliC : VTQVQKPVAA---PA---AIQAQLTAHVITGADTAEMVVKMSYTDKNGTIDGGFGVKV : 311
B560_FliC : KTIDEKPLKA---SSVQDALKAAGIADVAEAAITVVKMSYTDKNGTIDGGYGIKV : 316
B558_FliC : KTIDEKPLKA---SSVQDALKAAGIADVAEAAITVVKMSYTDKNGTIDGGYGIKV : 315

```

Continued on next page

\* 360 \* 380 \*  
 B554\_FliC : DLEANN-AVKGESKITVNGAEYTNANATDKITL-----AGKTMFID : 377  
 B2359\_FliC : DLEANN-AVKGESKITVNGAEYTNANATDKITL-----AGKTMFID : 377  
 B2486\_FliC : DLEANN-AVKGESKITVNGAEYTNANATDKITL-----AGKTMFID : 377  
 B2334\_FliC : DLEANN-AVKGESKITVNGAEYTNANATDKITL-----AGKTMFID : 377  
 R160\_FliC : GNDYYAADYDEKTGEIKAKTVNVTDAATATKTVGAVKFGGANGSIVVTATVDGNTYQA : 366  
 B1533\_FliC : GDDFYAATYDEKTGAI TAKTTTYTDGTVVAQTGAVKFGGANGSIVVTATDGKTYLA : 377  
 B1830\_FliC : GDDFYAATYDEKTGAI TAKTTTYTDGTVVAQTGAVKFGGANGSIVVTATDGKTYLA : 377  
 B1040\_FliC : VGDDYYSATONKDGSI SINTTKYTADDGTSKTAENKLG GADGNTVVSIGGKTYAAS : 365  
 B1085\_FliC : VGDDYYSATONKDGSI SINTTKYTADDGTSKTAENKLG GADGNTVVSIGGKTYAAS : 365  
 B2075\_FliC : VGDDYYSATONKDGSI SINTTKYTADDGTSKTAENKLG GADGNTVVSIGGKTYAAS : 365  
 B2078\_FliC : VGDDYYSATONKDGSI SINTTKYTADDGTSKTAENKLG GADGNTVVSIGGKTYAAS : 365  
 B2183\_FliC : VGDDYYSATONKDGSI SINTTKYTADDGTSKTAENKLG GADGNTVVSIGGKTYAAS : 365  
 B2257\_FliC : VGDDYYSATONKDGSI SINTTKYTADDGTSKTAENKLG GADGNTVVSIGGKTYAAS : 365  
 B2396\_FliC : VGDDYYSATONKDGSI SINTTKYTADDGTSKTAENKLG GADGNTVVSIGGKTYAAS : 365  
 xy82\_FliC : VGDDYYSATONKDGSI SINTTKYTADDGTSKTAENKLG GADGNTVVSIGGKTYAAS : 365  
 R269\_FliC : VGDDYYSATONKDGSI SINTTKYTADDGTSKTAENKLG GADGNTVVSIGGKTYAAS : 367  
 xy810\_FliC : SGGYYAASVDKSGAASLKVTSYVDATTGTEKTAENKLG GADGNTVVTIDGKTYNAS : 373  
 B571\_FliC : GDDIYA-ATKNKDGSI SINATTEYTDKDNNTKTAENQLGGVDGNTVVTIDGKTYNAS : 364  
 B1951\_FliC : GADIYA-ATKNKDGSI SINATTEYTDKDNNTKTAENQLGGADGNTVVSIDGKTYNAS : 367  
 B560\_FliC : GDDYYA-ATKEKDGSI SINSTSYTDKDNNTKTAENQLGGADGNTVVSIDGKTYNAS : 372  
 B558\_FliC : GDDYYA-ATKEKDGSI SINSTSYTDKDNNTKTAENQLGGADGNTVVSIDGKTYNAS : 371

G T

\* 420 \* 440 \*  
 B554\_FliC : KTA-SGVSTLINEDAAAANKKSTANFLASDSALS KVDVAVSSLAQGNFSDSAITNL : 433  
 B2359\_FliC : KTA-SGVSTLINEDAAAANKKSTANFLASDSALS KVDVAVSSLAQGNFSDSAITNL : 433  
 B2486\_FliC : KTA-SGVSTLINEDAAAANKKSTANFLASDSALS KVDVAVSSLAQGNFSDSAITNL : 433  
 B2334\_FliC : KTA-SGVSTLINEDAAAANKKSTANFLASDSALS KVDVAVSSLAQGNFSDSAITNL : 433  
 R160\_FliC : SDVKGHNFSQSGALSEAVTTKTENFLAKDAALAQVDALRSDLAGVGNFNSAITNL : 423  
 B1533\_FliC : SDLDKHNFRGTGELKEVNTDKTENFLQKDAALAQVDTLRSDLAGVGNFNSAITNL : 434  
 B1830\_FliC : SDLDKHNFRGTGELKEVNTDKTENFLQKDAALAQVDTLRSDLAGVGNFNSAITNL : 434  
 B1040\_FliC : KAE-GHNFKAQPDLAEEAATTTENFLQKDAALAQVDTLRSDLAGVGNFNSAITNL : 421  
 B1085\_FliC : KAE-GHNFKAQPDLAEEAATTTENFLQKDAALAQVDTLRSDLAGVGNFNSAITNL : 421  
 B2075\_FliC : KAE-GHNFKAQPDLAEEAATTTENFLQKDAALAQVDTLRSDLAGVGNFNSAITNL : 421  
 B2078\_FliC : KAE-GHNFKAQPDLAEEAATTTENFLQKDAALAQVDTLRSDLAGVGNFNSAITNL : 421  
 B2183\_FliC : KAE-GHNFKAQPDLAEEAATTTENFLQKDAALAQVDTLRSDLAGVGNFNSAITNL : 421  
 B2257\_FliC : KAE-GHNFKAQPDLAEEAATTTENFLQKDAALAQVDTLRSDLAGVGNFNSAITNL : 421  
 B2396\_FliC : KAE-GHNFKAQPDLAEEAATTTENFLQKDAALAQVDTLRSDLAGVGNFNSAITNL : 421  
 xy82\_FliC : KAE-GHNFKAQPDLAEEAATTTENFLQKDAALAQVDTLRSDLAGVGNFNSAITNL : 421  
 R269\_FliC : KAE-GHNFKAQPDLAEEAATTTENFLQKDAALAQVDTLRSDLAGVGNFNSAITNL : 423  
 xy810\_FliC : KAA-GHNFKAQPELAEAAATTTENFLQKDAALAQVDALRSDLAGVGNFNSAITNL : 429  
 B571\_FliC : KAA-GHDFKAQPELAEAAATTTENFLQKDAALAQVDALRSDLAGVGNFNSAITNL : 420  
 B1951\_FliC : KAA-GHNFKAQPELAEAAATTTENFLQKDAALAQVDALRSDLAGVGNFNSAITNL : 423  
 B560\_FliC : KAA-GHNFKAQPDLAEEAATTTENFLQKDAALAQVDALRSDLAGVGNFNSAITNL : 428  
 B558\_FliC : KAA-GHNFKAQPDLAEEAATTTENFLQKDAALAQVDALRSDLAGVGNFNSAITNL : 427

T NPL ID AL VD 6RS LGA6QNR F1SAITNL

460 \* 480 \* 500 \*  
 B554\_FliC : GNTVTNLSAARSRIEDADYATEVSNMSPAQILOCA TSVLAQANQVPQNVLSLLR\* : 488  
 B2359\_FliC : GNTVTNLSAARSRIEDADYATEVSNMSPAQILOCA TSVLAQANQVPQNVLSLLR\* : 488  
 B2486\_FliC : GNTVTNLSAARSRIEDADYATEVSNMSPAQILOCA TSVLAQANQVPQNVLSLLR\* : 488  
 B2334\_FliC : GNTVTNLSAARSRIEDADYATEVSNMSPAQILOCA TSVLAQANQVPQNVLSLLR\* : 488  
 R160\_FliC : GNTVNNLSEAARSRIEDSDYATEVSNMSPAQILOCA TSVLAQANQVPQNVLSLLR\* : 478  
 B1533\_FliC : GNTVNNLSSAARSRIEDSDYATEVSNMSPAQILOCA TSVLAQANQVPQNVLSLLR\* : 489  
 B1830\_FliC : GNTVNNLSSAARSRIEDSDYATEVSNMSPAQILOCA TSVLAQANQVPQNVLSLLR\* : 489  
 B1040\_FliC : GNTVNNLSSAARSRIEDSDYATEVSNMSPAQILOCA TSVLAQANQVPQNVLSLLR\* : 476  
 B1085\_FliC : GNTVNNLSSAARSRIEDSDYATEVSNMSPAQILOCA TSVLAQANQVPQNVLSLLR\* : 476  
 B2075\_FliC : GNTVNNLSSAARSRIEDSDYATEVSNMSPAQILOCA TSVLAQANQVPQNVLSLLR\* : 476  
 B2078\_FliC : GNTVNNLSSAARSRIEDSDYATEVSNMSPAQILOCA TSVLAQANQVPQNVLSLLR\* : 476  
 B2183\_FliC : GNTVNNLSSAARSRIEDSDYATEVSNMSPAQILOCA TSVLAQANQVPQNVLSLLR\* : 476  
 B2257\_FliC : GNTVNNLSSAARSRIEDSDYATEVSNMSPAQILOCA TSVLAQANQVPQNVLSLLR\* : 476  
 B2396\_FliC : GNTVNNLSSAARSRIEDSDYATEVSNMSPAQILOCA TSVLAQANQVPQNVLSLLR\* : 476  
 xy82\_FliC : GNTVNNLSSAARSRIEDSDYATEVSNMSPAQILOCA TSVLAQANQVPQNVLSLLR\* : 476  
 R269\_FliC : GNTVNNLSSAARSRIEDSDYATEVSNMSPAQILOCA TSVLAQANQVPQNVLSLLR\* : 478  
 xy810\_FliC : GNTVNNLSSAARSRIEDSDYATEVSNMSPAQILOCA TSVLAQANQVPQNVLSLLR\* : 484  
 B571\_FliC : GNTVNNLSSAARSRIEDSDYATEVSNMSPAQILOCA TSVLAQANQVPQNVLSLLR\* : 475  
 B1951\_FliC : GNTVNNLSSAARSRIEDSDYATEVSNMSPAQILOCA TSVLAQANQVPQNVLSLLR\* : 478  
 B560\_FliC : GNTVNNLSSAARSRIEDSDYATEVSNMSPAQILOCA TSVLAQANQVPQNVLSLLR\* : 483  
 B558\_FliC : GNTVNNLSSAARSRIEDSDYATEVSNMSPAQILOCA TSVLAQANQVPQNVLSLLR\* : 482

GNTV NL ARSRIED DYATEVSNMSPAQILOQAGTSVLAQANQVPQNVLSLLR

Continued on next page

## Faber *et al.*, Figure S9

**Fig. S9: amino acid alignment of FliC flagellin sequences of *Salmonella* isolates used in this study.** *fliC* genes of *Salmonella* isolates were amplified using the primers FSa1 and rFSa1 (Dauga *et al.*, 1998) and Sanger-sequenced using the same primers and additionally primer rFSa1\_2 (see Suppl. Tab. 7). Derived amino acid sequences (first 17 amino acids not sequenced) were aligned using ClustalOmega (Sievers *et al.*, 2011) and depicted according to their physico-chemical properties using GeneDoc (Nicholas *et al.*, 1997). Strain numbers of strains listed in Table 1 which are included in this alignment but not in Fig. S10 only possess the *fliC* gene (e.g. B571) and served as experimental controls for the strains' FliC flagellin-specific activation potential.



```

*      240      *      260      *      280      *      300
B558_F1jB : A-DTANNGKYEVTVDSATFAVSFGATPTSTVT-SDTAVTK--VQVNAFVAADAATKALQDGGVSSADASAATLV : 297
B560_F1jB : A-DTANNGKYEVTVDSATFAVSFGATPTSTVT-SDTAVTK--VQVNAFVAADAATKALQDGGVSSADASAATLV : 297
xy82_F1jB : A-DAAANGDYEVNVATD-KVTLATGATTTMPAGAATKTEVLELKDTFAVVSADANALIAGGVDTADANAATLV : 301
R269_F1jB : A-DAAANGDYEVNVATD-STVTLAAGATTTMPAGATTKTEVLELKDTFAVVSADANALIAGGVDTADANGAELV : 301
R160_F1jB : A-DAAANGDYEVNVATD-STVTLAAGATTTMPASATTKTEVLELKDTFAVVSADANALIAGGVDTADANGAELV : 302
xy810_F1jB : A-DAAANGDYEVNVATD-STVTLAAGATTTMPAGATTKTEVLELKDTFAVVSADANALIAGGVDTADANGAELV : 302
B815_F1jB : A-DAAANGDYEVNVATD-STVTLAAGATTTMPAGATTKTEVLELKDTFAVVSADANALIAGGVDTADANGAELV : 301
B1951_F1jB : A-DAAANGDYEVNVATD-KVTLATSATTTMPAGAATKTEVLELKDTFAVVSADANALIAGGVDTADANAATLV : 301
B1040_F1jB : A-DAAANGDYEVNVATD-STVTLAAGATTTMPAGVTTKTEVLELTTFVVSADANALIAGGVDTADANAATLV : 301
B1085_F1jB : A-DAAANGDYEVNVATD-STVTLAAGATTTMPAGVTTKTEVLELTTFVVSADANALIAGGVDTADANAATLV : 301
B2078_F1jB : A-DAAANGDYEVNVATD-STVTLAAGATTTMPAGVTTKTEVLELTTFVVSADANALIAGGVDTADANAATLV : 301
B2183_F1jB : A-DAAANGDYEVNVATD-STVTLAAGATTTMPAGVTTKTEVLELTTFVVSADANALIAGGVDTADANAATLV : 301
B2257_F1jB : A-DAAANGDYEVNVATD-STVTLAAGATTTMPAGVTTKTEVLELTTFVVSADANALIAGGVDTADANAATLV : 301
B2396_F1jB : A-DAAANGDYEVNVATD-STVTLAAGATTTMPAGVTTKTEVLELTTFVVSADANALIAGGVDTADANAATLV : 301
B1050_F1jB : A-DAAANGDYEVNVATD-STVTLAAGATTTMPAGVTTKTEVLELTTFVVSADANALIAGGVDTADANAATLV : 301
xy92_F1jB : A-DAAANGDYEVNVATD-STVTLAAGATTTMPAGVTTKTEVLELTTFVVSADANALIAGGVDTADANAATLV : 301
2075_F1jB : A-DAAANGDYEVNVATD-STVTLAAGATTTMPAGVTTKTEVLELTTFVVSADANALIAGGVDTADANAATLV : 301
A DaAKNGdYEVnVa3d G V3laagaTK3T6paG ttkTevqel tP v sAdaKNaLiaGGVd DAN A LV

```

```

*      320      *      340      *      360      *      380
B558_F1jB : MSYTDNNGKTIIEGGYALRAGDYYAADYDEATGAIKAKTTSYTAADGTTKTAANQLGGVDGKTEVVTIDGKT YNA : 373
B560_F1jB : MSYTDNNGKTIIEGGYALRAGDYYAADYDEATGAIKAKTTSYTAADGTTKTAANQLGGVDGKTEVVTIDGKT YNA : 373
xy82_F1jB : MXYTDNNGKTIIEGGYALRAGDYYAADYDEATGAIKAKTTSYTAADGTTKTAANQLGGVDGKTEVVTIDGKT YNA : 377
R269_F1jB : MSYTDNNGKTIIEGGYALRAGDYYAADYDEATGAIKAKTTSYTAADGTTKTAANQLGGVDGKTEVVTIDGKT YNA : 377
R160_F1jB : MSYTDNNGKTIIEGGYALRAGDYYAADYDEATGAIKAKTTSYTAADGTTKTAANQLGGVDGKTEVVTIDGKT YNA : 378
xy810_F1jB : MSYTDNNGKTIIEGGYALRAGDYYAADYDEATGAIKAKTTSYTAADGTTKTAANQLGGVDGKTEVVTIDGKT YNA : 378
B815_F1jB : MSYTDNNGKTIIEGGYALRAGDYYAADYDEATGAIKAKTTSYTAADGTTKTAANQLGGVDGKTEVVTIDGKT YNA : 377
B1951_F1jB : MSYTDNNGKTIIEGGYALRAGDYYAADYDEATGAIKAKTTSYTAADGTTKTAANQLGGVDGKTEVVTIDGKT YNA : 377
B1040_F1jB : MSYTDNNGKTIIEGGYALRAGDYYAADYDEATGAIKAKTTSYTAADGTTKTAANQLGGVDGKTEVVTIDGKT YNA : 377
B1085_F1jB : MSYTDNNGKTIIEGGYALRAGDYYAADYDEATGAIKAKTTSYTAADGTTKTAANQLGGVDGKTEVVTIDGKT YNA : 377
B2078_F1jB : MSYTDNNGKTIIEGGYALRAGDYYAADYDEATGAIKAKTTSYTAADGTTKTAANQLGGVDGKTEVVTIDGKT YNA : 377
B2183_F1jB : MSYTDNNGKTIIEGGYALRAGDYYAADYDEATGAIKAKTTSYTAADGTTKTAANQLGGVDGKTEVVTIDGKT YNA : 377
B2257_F1jB : MSYTDNNGKTIIEGGYALRAGDYYAADYDEATGAIKAKTTSYTAADGTTKTAANQLGGVDGKTEVVTIDGKT YNA : 377
B2396_F1jB : MSYTDNNGKTIIEGGYALRAGDYYAADYDEATGAIKAKTTSYTAADGTTKTAANQLGGVDGKTEVVTIDGKT YNA : 377
B1050_F1jB : MSYTDNNGKTIIEGGYALRAGDYYAADYDEATGAIKAKTTSYTAADGTTKTAANQLGGVDGKTEVVTIDGKT YNA : 377
xy92_F1jB : MSYTDNNGKTIIEGGYALRAGDYYAADYDEATGAIKAKTTSYTAADGTTKTAANQLGGVDGKTEVVTIDGKT YNA : 377
2075_F1jB : MSYTDNNGKTIIEGGYALRAGDYYAADYDEATGAIKAKTTSYTAADGTTKTAANQLGGVDGKTEVVTIDGKT YNA : 377
KMsYTDKNGKTIIEGGYALKAGDKYYAADYDEATGAIKAKTTSYTAADGTTKTAANQLGGVDGKTEVVTIDGKTYNA

```

```

*      400      *      420      *      440      *
B558_F1jB : SAAAGDFKACPELAAAAAATTENPLQKIDAALAQVDALRSDLGAVQNRFNSAITNLGNTVNNLSAASRIEDSDY : 449
B560_F1jB : SAAAGDFKACPELAAAAAATTENPLQKIDAALAQVDALRSDLGAVQNRFNSAITNLGNTVNNLSAASRIEDSDY : 449
xy82_F1jB : SAAAGDFKACPELAAAAAATTENPLQKIDAALAQVDALRSDLGAVQNRFNSAITNLGNTVNNLSAASRIEDSDY : 453
R269_F1jB : SAAAGDFKACPELAAAAAATTENPLQKIDAALAQVDALRSDLGAVQNRFNSAITNLGNTVNNLSAASRIEDSDY : 453
R160_F1jB : SAAAGDFKACPELAAAAAATTENPLQKIDAALAQVDALRSDLGAVQNRFNSAITNLGNTVNNLSAASRIEDSDY : 454
xy810_F1jB : SAAAGDFKACPELAAAAAATTENPLQKIDAALAQVDALRSDLGAVQNRFNSAITNLGNTVNNLSAASRIEDSDY : 454
B815_F1jB : SAAAGDFKACPELAAAAAATTENPLQKIDAALAQVDALRSDLGAVQNRFNSAITNLGNTVNNLSAASRIEDSDY : 453
B1951_F1jB : SAAAGDFKACPELAAAAAATTENPLQKIDAALAQVDALRSDLGAVQNRFNSAITNLGNTVNNLSAASRIEDSDY : 453
B1040_F1jB : SAAAGDFKACPELAAAAAATTENPLQKIDAALAQVDALRSDLGAVQNRFNSAITNLGNTVNNLSAASRIEDSDY : 453
B1085_F1jB : SAAAGDFKACPELAAAAAATTENPLQKIDAALAQVDALRSDLGAVQNRFNSAITNLGNTVNNLSAASRIEDSDY : 453
B2078_F1jB : SAAAGDFKACPELAAAAAATTENPLQKIDAALAQVDALRSDLGAVQNRFNSAITNLGNTVNNLSAASRIEDSDY : 453
B2183_F1jB : SAAAGDFKACPELAAAAAATTENPLQKIDAALAQVDALRSDLGAVQNRFNSAITNLGNTVNNLSAASRIEDSDY : 453
B2257_F1jB : SAAAGDFKACPELAAAAAATTENPLQKIDAALAQVDALRSDLGAVQNRFNSAITNLGNTVNNLSAASRIEDSDY : 453
B2396_F1jB : SAAAGDFKACPELAAAAAATTENPLQKIDAALAQVDALRSDLGAVQNRFNSAITNLGNTVNNLSAASRIEDSDY : 453
B1050_F1jB : SAAAGDFKACPELAAAAAATTENPLQKIDAALAQVDALRSDLGAVQNRFNSAITNLGNTVNNLSAASRIEDSDY : 453
xy92_F1jB : SAAAGDFKACPELAAAAAATTENPLQKIDAALAQVDALRSDLGAVQNRFNSAITNLGNTVNNLSAASRIEDSDY : 453
2075_F1jB : SAAAGDFKACPELAAAAAATTENPLQKIDAALAQVDALRSDLGAVQNRFNSAITNLGNTVNNLSAASRIEDSDY : 453
SKAAGHDFKACPELAAEAANKTTENPLQKIDAALAQVDALRSDLGAVQNRFNSAITNLGNTVNNLSAASRIEDSDY

```

Continued on next page

|            |     |   |     |   |   |   |   |   |   |   |   |   |   |   |   |   |   |   |   |   |   |   |   |   |   |   |   |   |   |   |   |   |     |   |   |   |   |  |  |
|------------|-----|---|-----|---|---|---|---|---|---|---|---|---|---|---|---|---|---|---|---|---|---|---|---|---|---|---|---|---|---|---|---|---|-----|---|---|---|---|--|--|
|            | 460 | * | 480 | * |   |   |   |   |   |   |   |   |   |   |   |   |   |   |   |   |   |   |   |   |   |   |   |   |   |   |   |   |     |   |   |   |   |  |  |
| B558_F1jB  | :   | A | T   | V | S | N | M | S | A | I | L | C | A | G | T | S | V | L | A | A | N | V | P | N | V | L | S | L | L | R | * | : | 485 |   |   |   |   |  |  |
| B560_F1jB  | :   | A | T   | V | S | N | M | S | A | I | L | C | A | G | T | S | V | L | A | A | N | V | P | N | V | L | S | L | L | R | * | : | 485 |   |   |   |   |  |  |
| xy82_F1jB  | :   | A | T   | V | S | N | M | S | A | I | L | C | A | G | T | S | V | L | A | A | N | V | P | N | V | L | S | L | L | R | * | : | 489 |   |   |   |   |  |  |
| R269_F1jB  | :   | A | T   | V | S | N | M | S | A | I | L | C | A | G | T | S | V | L | A | A | N | V | P | N | V | L | S | L | L | R | * | : | 489 |   |   |   |   |  |  |
| R160_F1jB  | :   | A | T   | V | S | N | M | S | A | I | L | C | A | G | T | S | V | L | A | A | N | V | P | N | V | L | S | L | L | R | * | : | 490 |   |   |   |   |  |  |
| xy810_F1jB | :   | A | T   | V | S | N | M | S | A | I | L | C | A | G | T | S | V | L | A | A | N | V | P | N | V | L | S | L | L | R | * | : | 490 |   |   |   |   |  |  |
| B815_F1jB  | :   | A | T   | V | S | N | M | S | A | I | L | C | A | G | T | S | V | L | A | A | N | V | P | N | V | L | S | L | L | R | * | : | 489 |   |   |   |   |  |  |
| B1951_F1jB | :   | A | T   | V | S | N | M | S | A | I | L | C | A | G | T | S | V | L | A | A | N | V | P | N | V | L | S | L | L | R | * | : | 489 |   |   |   |   |  |  |
| B1040_F1jB | :   | A | T   | V | S | N | M | S | A | I | L | C | A | G | T | S | V | L | A | A | N | V | P | N | V | L | S | L | L | R | * | : | 489 |   |   |   |   |  |  |
| B1085_F1jB | :   | A | T   | V | S | N | M | S | A | I | L | C | A | G | T | S | V | L | A | A | N | V | P | N | V | L | S | L | L | R | * | : | 489 |   |   |   |   |  |  |
| B2078_F1jB | :   | A | T   | V | S | N | M | S | A | I | L | C | A | G | T | S | V | L | A | A | N | V | P | N | V | L | S | L | L | R | * | : | 489 |   |   |   |   |  |  |
| B2183_F1jB | :   | A | T   | V | S | N | M | S | A | I | L | C | A | G | T | S | V | L | A | A | N | V | P | N | V | L | S | L | L | R | * | : | 489 |   |   |   |   |  |  |
| B2257_F1jB | :   | A | T   | V | S | N | M | S | A | I | L | C | A | G | T | S | V | L | A | A | N | V | P | N | V | L | S | L | L | R | * | : | 489 |   |   |   |   |  |  |
| B2396_F1jB | :   | A | T   | V | S | N | M | S | A | I | L | C | A | G | T | S | V | L | A | A | N | V | P | N | V | L | S | L | L | R | * | : | 489 |   |   |   |   |  |  |
| B1050_F1jB | :   | A | T   | V | S | N | M | S | A | I | L | C | A | G | T | S | V | L | A | A | N | V | P | N | V | L | S | L | L | R | * | : | 489 |   |   |   |   |  |  |
| xy92_F1jB  | :   | A | T   | V | S | N | X | S | A | I | L | C | A | G | T | X | V | L | A | A | N | V | P | N | V | L | S | L | L | R | * | : | 489 |   |   |   |   |  |  |
| 2075_F1jB  | :   | A | T   | V | S | N | M | S | A | I | L | C | A | G | T | S | V | L | A | A | N | V | P | N | V | L | S | L | L | R | * | : | 489 |   |   |   |   |  |  |
|            |     | A | T   | E | V | S | N | m | S | R | A | Q | I | L | Q | Q | A | G | T | s | V | L | A | Q | A | N | Q | V | P | Q | N | V | L   | S | L | L | R |  |  |

**Faber et al., Figure S10**

**Fig. S10: amino acid alignment of FljB flagellin sequences of *Salmonella* isolates used in this study.** *fljB* genes of *Salmonella* isolates were amplified using the primers FSa2 and rFSa2 (Dauga et al., 1998) and Sanger-sequenced using the same primers and additionally primer rFSa1\_3 (see Suppl. Tab 7). Derived amino acid sequences (first 16 or 17 amino acids not sequenced) were aligned with ClustalOmega (Sievers et al., 2011) and depicted according to their physico-chemical properties using GeneDoc (Nicholas et al., 1997). Strain numbers of strains listed in Table 1 which are included in this alignment but not in Fig. S9 only possess the *flgJ* gene (e.g. B815) and served as controls for the strains' FlgJ flagellin-specific activation potential.





|        |                                                                |     |
|--------|----------------------------------------------------------------|-----|
| chTLR5 | flsvtllmflmstiiiftrcrgicfvwyktttktligshppaadtsseymydaylcyskndf | 706 |
| mTLR5  | lctvtltlflvitlvvikfrgicfcicyktaqrlvfkdkvwslepgayrydaylcfsskdf  | 719 |
| hTLR5  | vctvtltlflmtilvtvkfrgfcfcicyktaqrlvfkdhpggqtepdmykydaylcfsskdf | 704 |
| bTLR5  | lvtvtltlflvitlavtkfrgfcfcicykkaqsllfkdpikgresdtykydaylcfsskdf  | 704 |
| pTLR5  | lftvtltlflfvailvmmkfrgfcfcicykqvrlvfkdpislgresdtykydaylcfsgkdf | 703 |
|        | . :*** :::: : . : **:**: **. : : . : . * ****:** * :**         |     |
| chTLR5 | ewvqnsllkhldsqqyfdknrftlcfceerdfpgeehinnirdaiwksrkticvvtqrqflk | 766 |
| mTLR5  | ewaqnallkhldahyssrnrllrlcfceerdfipgenhisniqaavwgsrktvclvsrhflr | 779 |
| hTLR5  | twvqnallkhldtqysdqnrfnlcfceerdfvpgenrianiqdaiwnsrkivclvsrhflr  | 764 |
| bTLR5  | ewvqnall-hldvqyhsqnrfnlcfceerdfmpgenhianiqdavwssrkivclvsrhflr  | 763 |
| pTLR5  | ewvqeallknldaqysdqnrlnlcfceerdfvpgedrisniqdavwssrkvvclvsrhflr  | 763 |
|        | *. :*** :** * :. :** : *****:**:** * ** : * * ** * :* :* :** : |     |
| chTLR5 | dgwcvcafnfaqsryfsdlkevlmrvvgsqyqlmkhkpriiflqrsrylrwpedyqd      | 826 |
| mTLR5  | dgwcleafryaqsrsldksilivvvvgsqyqlmrhetirgflqkqqylrwpedlqd       | 839 |
| hTLR5  | dgwcleafsyaggrclsdlnsalimvvvgsqyqlmkhqsirgfvqkqqylrwpedfkd     | 824 |
| bTLR5  | dgwcleafsyagsrcladlmgalimvvvgsqfhlmrhqsirgfvqkrqylrwpedlqd     | 823 |
| pTLR5  | dgwcleafsyagsrcladlmgtlmrvvgsqyqlmkhqsirgfvkrqyylrwpedlqd      | 823 |
|        | ***:** * :** * :. :** : ** :***** ** :*** : ** * : : ***** **  |     |
| chTLR5 | igwfldnlssqilkekkvqrvnsvgielqtiatvsh                           | 861 |
| mTLR5  | vgwfldklsqgilkeekakkrsssigrtiatis-                             | 873 |
| hTLR5  | vgwflhklssqilkekekkkdnniplqtvatis-                             | 858 |
| bTLR5  | vdwflnklsqgilkekerkkdsaiqlqnvttis-                             | 857 |
| pTLR5  | vswflnklsqyilkvkekkkdsdiqlqsv-tis-                             | 856 |
|        | :.***:** * :** : * :. . * * :. : :                             |     |

## Faber *et al.*, Figure S11

**Fig. S11: amino acid alignment of all full-length TLR5 proteins expressed from pEF6-V5 constructs and used for activation in this study.** chTLR5 = *Gallus gallus* TLR5; m = *Mus musculus* TLR5; hTLR5 = *Homo sapiens* TLR5; bTLR5 = *Bos taurus* TLR5; pTLR5 = *Sus scrofa* TLR5. Symbols below the alignment designate the level of amino acid (aa) identity or conservation at each site: asterisk = identical aa; two dots = highly conserved aa; one dot = moderately conserved aa. Nucleotide sequences of each cloned insert were determined by Sanger sequencing and translated into amino acid sequences. The alignment was prepared using ClustalOmega (Sievers *et al.*, 2011).

## Supplementary Tables

**Table S1:** *Campylobacter jejuni* or *Salmonella enterica* isolates used in this study.

| Bacterial isolate                                   | Isolate designation    |      | Isolated from | Host species                                           |
|-----------------------------------------------------|------------------------|------|---------------|--------------------------------------------------------|
| <i>Campylobacter jejuni</i> (ST-50)                 | 68                     |      | Human feces   | Humans, poultry, swine, cattle, sheep, cats, dogs      |
| <i>Campylobacter jejuni</i> (ST-45)                 | 69                     |      | Human feces   | s. a.                                                  |
| <i>Campylobacter jejuni</i> (ST-50)                 | 70                     |      | Human feces   | s. a.                                                  |
| <i>Campylobacter jejuni</i> (ST-21)                 | 71                     |      | Human feces   | s. a.                                                  |
| <i>Campylobacter jejuni</i> (ST-50)                 | 72                     |      | Human feces   | s. a.                                                  |
| <i>Campylobacter jejuni</i> (ST-21)                 | 73                     |      | Human feces   | s. a.                                                  |
| <i>Campylobacter jejuni</i> (ST-45)                 | 75                     |      | Human feces   | s. a.                                                  |
| <i>Campylobacter jejuni</i> (ST-21)                 | 87                     |      | Human feces   | s. a.                                                  |
| <i>Campylobacter jejuni</i> (ST-21)                 | 89                     |      | Human feces   | s. a.                                                  |
| <i>Campylobacter jejuni</i> (ST-21)                 | 90                     |      | Human feces   | s. a.                                                  |
| <i>Campylobacter jejuni</i> ATCC 700819             | NCTC 11168             |      | Human feces   | s. a.                                                  |
| <i>Campylobacter jejuni</i> (ST-21)                 | FBI 04321 <sup>A</sup> |      | Aviary bird   | s. a.                                                  |
| <i>Campylobacter jejuni</i> (ST-21)                 | FBI 04371 <sup>A</sup> |      | Sheep         | s. a.                                                  |
| <i>Campylobacter jejuni</i> (ST-21)                 | 1                      |      | Broiler       | s. a.                                                  |
| <i>Campylobacter jejuni</i> (ST-21)                 | FBI 04197 <sup>A</sup> |      | Cattle feces  | s. a.                                                  |
| <i>Campylobacter jejuni</i> (ST-21)                 | FBI 02626 <sup>A</sup> |      | Broiler       | s. a.                                                  |
| <i>Campylobacter jejuni</i> (ST-21)                 | FBI 04199 <sup>A</sup> |      | Cattle feces  | s. a.                                                  |
| <i>Salmonella enterica</i> serovar Bovismorbificans | xy                     | 82   | n. s.         | Cattle, horses                                         |
| <i>Salmonella enterica</i> serovar Choleraesuis     | B                      | 815  | Human blood   | Swine                                                  |
| <i>Salmonella enterica</i> serovar Choleraesuis     | xy                     | 810  | n. s.         | s. a.                                                  |
| <i>Salmonella enterica</i> serovar Typhimurium      | RV                     | 269  | n. s.         | Humans, cattle, swine, sheep, horses, rodents, poultry |
| <i>Salmonella enterica</i> serovar Enteritidis      | B                      | 554  | Human feces   | Humans, rodents, poultry, horses                       |
| <i>Salmonella enterica</i> serovar Enteritidis      | B                      | 558  | Human feces   | s. a.                                                  |
| <i>Salmonella enterica</i> serovar Enteritidis      | B                      | 560  | Human feces   | s. a.                                                  |
| <i>Salmonella enterica</i> serovar Enteritidis      | B                      | 571  | Human feces   | s. a.                                                  |
| <i>Salmonella enterica</i> serovar Enteritidis      | B                      | 2334 | Human blood   | s. a.                                                  |
| <i>Salmonella enterica</i> serovar Enteritidis      | B                      | 2359 | Human feces   | s. a.                                                  |
| <i>Salmonella enterica</i> serovar Enteritidis      | B                      | 2486 | Human feces   | s. a.                                                  |
| <i>Salmonella enterica</i> serovar Infantis         | B                      | 1040 | Human urine   | Humans, poultry                                        |
| <i>Salmonella enterica</i> serovar Infantis         | B                      | 1050 | Human feces   | s. a.                                                  |
| <i>Salmonella enterica</i> serovar Infantis         | B                      | 1085 | Human feces   | s. a.                                                  |
| <i>Salmonella enterica</i> serovar Infantis         | B                      | 2075 | Human feces   | s. a.                                                  |
| <i>Salmonella enterica</i> serovar Infantis         | B                      | 2078 | Human feces   | s. a.                                                  |
| <i>Salmonella enterica</i> serovar Infantis         | B                      | 2183 | n. s.         | s. a.                                                  |
| <i>Salmonella enterica</i> serovar Infantis         | B                      | 2257 | n. s.         | s. a.                                                  |
| <i>Salmonella enterica</i> serovar Infantis         | B                      | 2396 | Human feces   | s. a.                                                  |
| <i>Salmonella enterica</i> serovar Infantis         | xy                     | 92   | n. s.         | s. a.                                                  |
| <i>Salmonella enterica</i> serovar Paratyphi A      | B                      | 1951 | Human blood   | Humans                                                 |
| <i>Salmonella enterica</i> serovar Paratyphi B      | RV                     | 160  | n. s.         | Humans                                                 |

|                                          |   |      |             |        |
|------------------------------------------|---|------|-------------|--------|
| <i>Salmonella enterica</i> serovar Typhi | B | 1533 | Human feces | Humans |
| <i>Salmonella enterica</i> serovar Typhi | B | 1830 | Human blood | s. a.  |

---

ST: sequence type

n. s.: not specified

s. a.: see above

<sup>A</sup>: *C. jejuni* isolates published in (Gripp *et al.*, 2011)

**Table S2:** Plasmids used in this study.

| Plasmid    | Vector  | Description                                                                                                                                        | Resistance       | Reference or Source                                         |
|------------|---------|----------------------------------------------------------------------------------------------------------------------------------------------------|------------------|-------------------------------------------------------------|
|            | pEF6-V5 | mammalian protein expression vector, originated from pEF6-TLR5-V5 by excision of the insert and removal of His-tag, EF-1 $\alpha$ promoter, V5-tag | Amp <sup>R</sup> | (Lee <i>et al.</i> , 2003)                                  |
| pEF6-hTLR5 | pEF6-V5 | protein expression plasmid for human TLR5; removal of His-tag                                                                                      | Amp <sup>R</sup> | (Smith, Jr. <i>et al.</i> , 2003; Lee <i>et al.</i> , 2003) |
| pCJ800     | pEF6-V5 | protein expression plasmid for mouse TLR5 (pEF6-mTLR5-V5)                                                                                          | Amp <sup>R</sup> | This study                                                  |
| pCJ801     | pEF6-V5 | protein expression plasmid for chicken TLR5 (pEF6-chTLR5-V5)                                                                                       | Amp <sup>R</sup> | This study                                                  |
| pCJ1413    | pEF6    | Protein expression plasmid for chTLR5 without V5                                                                                                   | Amp <sup>R</sup> | This study                                                  |
| pCJ1414    | pEF6-V5 | protein expression plasmid for pig TLR5 (pEF6-piTLR5-V5)                                                                                           | Amp <sup>R</sup> | This study                                                  |
| pCJ1406    | pEF6-V5 | protein expression plasmid for bovine TLR5 (pEF6-boTLR5-V5)                                                                                        | Amp <sup>R</sup> | This study                                                  |
| pCJ1045    | pEF6-V5 | protein expression plasmid for chimeric mouse/human TLR5 (pEF6-m/hTLR5-V5)                                                                         | Amp <sup>R</sup> | This study                                                  |
| pCJ1040    | pEF6-V5 | protein expression plasmid for chimeric chicken/human TLR5 (pEF6-ch/hTLR5-V5)                                                                      | Amp <sup>R</sup> | This study                                                  |
| pCJ1044    | pEF6-V5 | protein expression plasmid for chimeric pig/human TLR5 (pEF6-pi/hTLR5-V5)                                                                          | Amp <sup>R</sup> | This study                                                  |
| pCJ1407    | pEF6-V5 | protein expression plasmid for chimeric bovine/human TLR5 (pEF6-bo/hTLR5-V5)                                                                       | Amp <sup>R</sup> | This study                                                  |
|            | pET28a  | Protein expression vector, T7 <i>lac</i> promoter, 6xHis tag, T7 tag                                                                               | Km <sup>R</sup>  | Novagen                                                     |
| pCJ375     | pET28a  | <i>S. enterica</i> serovar Typhimurium LT2 <i>fliC</i> cloned into pET28a via BamHI and XhoI                                                       | Km <sup>R</sup>  | S. K. Lee and C. Josenhans, unpublished                     |

Amp<sup>R</sup>: ampicillin resistance, Km<sup>R</sup>: kanamycin resistance

**Table S3:** Oligonucleotides used for gene amplification and cloning.

| Gene                            | Primers            | Sequence (5'-3') <sup>a</sup>                              | T <sub>m</sub> (°C) | Reference                                     |
|---------------------------------|--------------------|------------------------------------------------------------|---------------------|-----------------------------------------------|
| <i>SalTy</i> LT2<br><i>fliC</i> | SalLT2FliCBamHI(F) | <u>CGGGATCC</u> ATGGCACAAAGTCAT<br>TAATAC                  | 49                  | S. K. Lee and<br>C. Josenhans,<br>unpublished |
|                                 | SalT2FliCEcoRI(R)  | CGGAATT <u>CCGCAGTAAAGAGAG</u><br>GACG                     | 51                  | S. K. Lee and<br>C. Josenhans,<br>unpublished |
| <i>chTLR5</i>                   | chTLR5_F1          | AAAGGTACCGAGTCCGGATCCA<br>TGATGTTACA<br>ATCAACGGCTAATAATTG | 65                  | This study                                    |
|                                 | chTLR5_R1          | AAAAGCGGCC <u>CGCGTGTGAGA</u><br>CTGTCGCTATA<br>GTTTG      | 69                  | This study                                    |
|                                 | chTLR5_R2          | <u>AGA</u> ACTTAAGTGTCTGCTGGAG                             | 55                  | This study                                    |
| <i>mTLR5</i>                    | mTLR5_F2           | AAAAGGTACCGCCGCCACCATG<br>GCATGTCAACTTGACTTG               | 65                  | This study                                    |
|                                 | mTLR5_R2           | AAAAGGTACCGCCGCCACCATG<br>GCATGTCAACTTGACTTG               | 51                  | This study                                    |
|                                 | mTLR5_R4           | GGAAA <u>ACTTAAAGAGACCC</u> ATG<br>GCTTC                   | 57                  | This study                                    |
| <i>piTLR5</i>                   | piTLR5_F1          | AAAAGGTACCGAGTCCGGATCC<br>ATGGGAGACTGCCTGGTCCTG            | 59                  | This study                                    |
|                                 | piTLR5_F2          | <u>ACCAAGTACATGGGAGTCCGGA</u><br>TCCATGGGAGACTGCCTGGTC     | 53                  | This study                                    |
|                                 | piTLR5_R1          | AAAAGCGGCC <u>CGCGGAGATGG</u><br>TCACGCTTTGCAAC            | 67                  | This study                                    |
|                                 | piTLR5_R2          | AAA <u>ACTTAAGGGACTCTAAGAC</u>                             | 55                  | This study                                    |
| <i>boTLR5</i>                   | boTLR5_BstXI_F     | AAACCAAGTACATGGGCCGCCA<br>CCATGGGAGACTGCCTTGA              | 51                  | This study                                    |
|                                 | boTLR5_NotI_R2     | AAAGCGGCC <u>CGCGGAGATGGT</u><br>GGTTACATTTT               | 51                  | This study                                    |
|                                 | boTLR5_BsaI_R      | GGAAA <u>ACTTAAAGAGACCTAAA</u><br>ACTTC                    | 51                  | This study                                    |
| <i>hMyD88</i>                   | hMyD88_F1          | TAAGAAGGACCAGCAGAGCC                                       | 59                  | S. K. Lee and<br>C. Josenhans,<br>unpublished |
|                                 | hMyD88_R1          | CATGTAGTCCAGCAACAGCC                                       | 59                  | S. K. Lee and<br>C. Josenhans,<br>unpublished |

<sup>a</sup>restriction sites in oligonucleotides are underlined; T<sub>m</sub>: annealing temperature.

**Table S4:** Oligonucleotides used for sequencing.

| <b>Gene</b>     | <b>Primers</b>    | <b>Sequence (5'-3')<sup>a</sup></b>                   | <b>T<sub>m</sub> (°C)</b> | <b>Reference</b>             |
|-----------------|-------------------|-------------------------------------------------------|---------------------------|------------------------------|
|                 | pEF6_R2           | ACAGATGGCTGGCAACTAGAAG                                | 61                        | C. Josenhans, unpublished    |
| <i>hTLR5</i>    | hTLR5_2025_R      | CTGGGCTGTCTTATAACAG                                   | 56                        | This study                   |
| <i>chTLR5</i>   | chTLR5_F1         | AAAGGTACCGAGTCCGGATCCATG<br>ATGTTACATCAACGGCTAATAATTG | 65                        | This study                   |
|                 | chTLR5_R2         | AGAACTTAAGTGTCTGCTGGAG                                | 55                        | This study                   |
| <i>piTLR5</i>   | piTLR5_F1         | AAAAGGTACCGAGTCCGGATCCAT<br>GGGAGACTGCCTGGTCCTG       | 59                        | This study                   |
|                 | piTLR5_R2         | AAAACCTTAAGGGACTCTAAGAC                               | 55                        | This study                   |
| <i>boTLR5</i>   | boTLR5_738_F      | AGCAATGCCATCAATGGGAG                                  | 55                        | This study                   |
|                 | boTLR5_1438_F     | TTGGAGAAAATATGTTGCAGC                                 | 53                        | This study                   |
|                 | pUNO1_hEF1-HTLV_F | TCCCTTGGAGCCTACCTA                                    | 51                        | This study                   |
|                 | pUNO1_SV40_R      | ATTGCAGCTTATAATGGTTAC                                 | 51                        | This study                   |
| <i>Sal_fliC</i> | FSa1              | CAAGTCATTAATACMAACAGCC                                | 55                        | (Dauga <i>et al.</i> , 1998) |
|                 | rFSa1             | TTAACGCAGTAAAGAGAGGAC                                 | 55                        | (Dauga <i>et al.</i> , 1998) |
|                 | rFSa1_2           | CGTAGCCGTATCGAAGAT                                    | 49                        | This study                   |
| <i>Sal_fliB</i> | rFSa2             | CAAGTAATCAACACTAACAGTC                                | 58                        | (Dauga <i>et al.</i> , 1998) |
|                 | rFSa2             | TTAACGTAACAGAGACAGCAC                                 | 58                        | (Dauga <i>et al.</i> , 1998) |
|                 | rFSa1_3           | CAACCTGTCTGAAGCGCGTAG                                 | 61                        | This study                   |

**Table S5:** Oligonucleotides used for site-directed mutagenesis.

| <b>Gene</b>                                | <b>Primers</b> | <b>Sequence (5'-3')<sup>a</sup></b>             | <b>T<sub>m</sub> (°C)</b> | <b>Reference</b> |
|--------------------------------------------|----------------|-------------------------------------------------|---------------------------|------------------|
| Insertion of stop codon upstream of V5 tag | pEF6_noV5_F    | CCGCTCGAGTCTATAGGGCCCGC<br>GGTTCG               | >81                       | This study       |
|                                            | pEF6_noV5_R    | CGAACCGCGGGCCCTATAGACTC<br>GAGCGG               | >81                       | This study       |
| Change N to A in chTLR5 (aa 744)           | chTLR5_Ala_F   | GCCTGGGGAAGAACATATCGCCA<br>ATATTCGTGATGCTATTTGG | >81                       | This study       |
|                                            | chTLR5_Ala_R   | CCAAATAGCATCACGAATATTGGC<br>GATATGTTCTTCCCCAGGC | >81                       | This study       |

aa: amino acid



**Table S6:** Antibodies used in this study.

| Antibody <sup>a</sup>                           | Application | Description/Dilution                                               | Source                                |
|-------------------------------------------------|-------------|--------------------------------------------------------------------|---------------------------------------|
| $\alpha$ -V5                                    | WB, IF      | Mouse, monoclonal/<br>1:5,000 (WB), 1:500 (IF)                     | Invitrogen, R960-25                   |
| $\alpha$ -actin <sup>a</sup>                    | WB          | Mouse, monoclonal/1:30,000                                         | Chemicon, MAB1501                     |
| $\alpha$ -GAPDH <sup>a</sup>                    | WB          | Rabbit, monoclonal/1:1,000                                         | Cell Signaling, 14C10                 |
| $\alpha$ -p38 <sup>a</sup>                      | WB          | Rabbit, polyclonal/1:1,000                                         | Cell Signaling, 9212                  |
| $\alpha$ -P-p38 <sup>a</sup><br>(Thr180/Tyr182) | WB          | Rabbit, polyclonal/1:1,000                                         | Cell Signaling, 9211                  |
| $\alpha$ -IRAK-I <sup>a</sup>                   | WB          | Rabbit, polyclonal/1:500                                           | Cell Signaling, 4359                  |
| $\alpha$ -IRAK-M <sup>a</sup>                   | WB          | Rabbit 1:1,000                                                     | Abcam, ab16534                        |
| $\alpha$ -MyD88 <sup>a</sup>                    | WB          | Rabbit, polyclonal/1:1,000                                         | Abcam, ab2068                         |
| $\alpha$ - <i>E. coli</i> flagellin             | WB          | Mouse, monoclonal/1:500                                            | Hölzel Diagnostika, 15D8              |
| Goat $\alpha$ -rabbit IgG<br>(H+L)              | WB          | Peroxidase-conjugated,<br>AffiniPure/1:10,000                      | Dianova/Jackson                       |
| Goat $\alpha$ -mouse IgG<br>(H+L)               | WB          | Peroxidase-conjugated,<br>AffiniPure F(ab') <sub>2</sub> /1:10,000 | Dianova/Jackson                       |
| Goat $\alpha$ -mouse<br>Alexa Fluor™ 488        | IF          | 1:5,000                                                            | Molecular Probes/<br>ThermoScientific |

<sup>a</sup> detected species: human

WB: Western Blot

IF: Immunofluorescence

**Table S7:** Oligonucleotides used for RT-PCR of chicken (*Gallus gallus*) genes.

| Gene                                    | Primers    | Sequence (5'-3') <sup>a</sup> | T <sub>m</sub> (°C) | Reference <sup>a</sup>       |
|-----------------------------------------|------------|-------------------------------|---------------------|------------------------------|
| <i>chGAPDH</i>                          | chGAPDH_F2 | AGGGTGGTGCTAAGCGTGTT          | 59                  | (Faber <i>et al.</i> , 2016) |
|                                         | chGAPDH_R2 | AAGGGTGCCAGGCAGTTG            | 59                  | (Faber <i>et al.</i> , 2016) |
| <i>chIL-CXCLi2</i><br>( <i>chIL-8</i> ) | chIL-8_F1  | CTGGCCCTCCTCCTGGTTTC          | 59                  | (Faber <i>et al.</i> , 2016) |
|                                         | chIL-8_R1  | TGGCGTCAGCTTCACATCTTG         | 59                  | (Faber <i>et al.</i> , 2016) |
| <i>chIL-1β</i>                          | chIL-1_F1  | CTGAGTCATGCATCGTTTATGTTT<br>C | 59                  | (Faber <i>et al.</i> , 2016) |
|                                         | chIL-1_R1  | AAATACCTCCACCCCGACAAG         | 59                  | (Faber <i>et al.</i> , 2016) |

<sup>a</sup> primers were designed and generously provided by Bernd Kaspers (LMU Munich)

### Supplementary Reference List

1. Dauga, C., Zabrovskaja, A., and Grimont, P.A. (1998) Restriction fragment length polymorphism analysis of some flagellin genes of *Salmonella enterica*. *J Clin Microbiol* **36**: 2835-2843.
2. Faber, E., Gripp, E., Maurischat, S., Kaspers, B., Tedin, K., Menz, S. *et al.* (2016) Novel Immunomodulatory Flagellin-Like Protein FlaC in *Campylobacter jejuni* and Other *Campylobacteriales*. *mSphere* **1**.
3. Gripp, E., Hlahla, D., Didelot, X., Kops, F., Maurischat, S., Tedin, K. *et al.* (2011) Closely related *Campylobacter jejuni* strains from different sources reveal a generalist rather than a specialist lifestyle. *BMC Genomics* **12**: 584-12.
4. Huh, J.W., Shibata, T., Hwang, M., Kwon, E.H., Jang, M.S., Fukui, R. *et al.* (2014) UNC93B1 is essential for the plasma membrane localization and signaling of Toll-like receptor 5. *Proc Natl Acad Sci U S A* **111**: 7072-7077.
5. Kim, J., Huh, J., Hwang, M., Kwon, E.H., Jung, D.J., Brinkmann, M.M. *et al.* (2013) Acidic amino acid residues in the juxtamembrane region of the nucleotide-sensing TLRs are important for UNC93B1 binding and signaling. *J Immunol* **190**: 5287-5295.
6. Larkin, M.A., Blackshields, G., Brown, N.P., Chenna, R., McGettigan, P.A., McWilliam, H. *et al.* (2007) Clustal W and Clustal X version 2.0. *Bioinformatics* **23**: 2947-2948.
7. Lee, S.K., Stack, A., Katzowitsch, E., Aizawa, S.I., Suerbaum, S., and Josenhans, C. (2003) *Helicobacter pylori* flagellins have very low intrinsic activity to stimulate human gastric epithelial cells via TLR5. *Microbes Infect* **5**: 1345-1356.
8. Nicholas, K.B., Nicholas H.B.J., and Deerfield, D.W.I. (1997) GeneDoc: Analysis and Visualization of Genetic Variation. *EMBNW NEWS* **4**: 14.
9. Sievers, F., Wilm, A., Dineen, D., Gibson, T.J., Karplus, K., Li, W. *et al.* (2011) Fast, scalable generation of high-quality protein multiple sequence alignments using Clustal Omega. *Mol Syst Biol* **7**: 539.
10. Smith, M.F., Jr., Mitchell, A., Li, G., Ding, S., Fitzmaurice, A.M., Ryan, K. *et al.* (2003) Toll-like receptor (TLR) 2 and TLR5, but not TLR4, are required for *Helicobacter pylori*-induced NF-kappa B activation and chemokine expression by epithelial cells. *J Biol Chem* **278**: 32552-32560.
11. Tamura, K., Peterson, D., Peterson, N., Stecher, G., Nei, M., and Kumar, S. (2011) MEGA5: molecular evolutionary genetics analysis using maximum likelihood, evolutionary distance, and maximum parsimony methods. *Mol Biol Evol* **28**: 2731-2739.
12. Xu, Y., Tao, X., Shen, B., Horng, T., Medzhitov, R., Manley, J.L., and Tong, L. (2000) Structural basis for signal transduction by the Toll/interleukin-1 receptor domains. *Nature* **408**: 111-115.
